# 1 **An autoactive *NB-LRR* gene causes *Rht13* dwarfism in wheat**

2

3 Philippa Borrill<sup>1</sup>†, Rohit Mago<sup>2</sup>, Tianyuan Xu<sup>3</sup>, Brett Ford<sup>4</sup>, Simon J Williams<sup>5</sup>, Adinda Derkx<sup>2</sup>,  
4 William D Bovill<sup>2</sup>, Jessica Hyles<sup>2</sup>, Dhara Bhatt<sup>2</sup>, Xiaodi Xia<sup>2</sup>, Colleen MacMillan<sup>2</sup>, Rosemary  
5 White<sup>2</sup>, Wolfram Buss<sup>5</sup>, István Molnár<sup>6\*</sup>, Sean Walkowiak<sup>7, 8</sup>, Odd-Arne Olsen<sup>9</sup>, Jaroslav  
6 Doležel<sup>6</sup>, Curtis J Pozniak<sup>8</sup>, Wolfgang Spielmeier<sup>2</sup>

7

8 <sup>1</sup> John Innes Centre, Norwich Research Park, Norwich, NR4 7UH, UK.

9 <sup>2</sup> CSIRO Agriculture and Food, Canberra, ACT 2601, Australia.

10 <sup>3</sup> Institute of Molecular, Cell and Systems Biology, College of Medical, Veterinary and Life  
11 Sciences, University of Glasgow, Glasgow G12 8QQ, UK.

12 <sup>4</sup> Grains Research and Development Corporation, Canberra, ACT 2600, Australia.

13 <sup>5</sup> Research School of Biology, The Australian National University, Canberra, ACT 2601,  
14 Australia.

15 <sup>6</sup> Institute of Experimental Botany of the Czech Academy of Sciences, Centre of the Region  
16 Hana for Biotechnological and Agricultural Research, Olomouc, Czech Republic.

17 <sup>7</sup> Grain Research Laboratory, Canadian Grain Commission, Winnipeg, Manitoba R3C 3G8,  
18 Canada.

19 <sup>8</sup> University of Saskatchewan, 51 Campus Drive, Saskatoon, SK, Canada.

20 <sup>9</sup> Norwegian University of Life Sciences, 1432 Ås, Norway.

21 \* Present address: Agricultural Institute, Centre for Agricultural Research, ELKH,  
22 Martonvásár, 2462 Hungary.

23 † Corresponding author, email: [philippa.borrill@jic.ac.uk](mailto:philippa.borrill@jic.ac.uk)

24

25 **Keywords:** Semi-dwarfing gene, *Reduced-height (Rht)* gene, autoactive NB-LRR, *Triticum*  
26 *aestivum* L. (wheat)

## 27 **Abstract**

28 Semidwarfing genes have greatly increased wheat yields globally, yet the widely used  
29 gibberellin (GA) insensitive genes *Rht-B1b* and *Rht-D1b* have disadvantages for seedling  
30 emergence. Use of the GA sensitive semidwarfing gene *Rht13* avoids this pleiotropic effect.  
31 Here we show that *Rht13* encodes a *nucleotide-binding site/leucine-rich repeat (NB-LRR)*  
32 gene. A point mutation in the semidwarf *Rht-B13b* allele autoactivates the *NB-LRR* gene and  
33 causes a height reduction comparable to *Rht-B1b* and *Rht-D1b* in diverse genetic  
34 backgrounds. The autoactive *Rht-B13b* allele leads to transcriptional upregulation of  
35 *pathogenesis-related* genes including *class III peroxidases* associated with cell wall  
36 remodelling. *Rht13* represents a new class of reduced height (*Rht*) gene, unlike other *Rht*  
37 genes which encode components of the GA signalling or metabolic pathways. This discovery  
38 opens new avenues to use autoactive *NB-LRR* genes as semidwarfing genes in a range of  
39 crop species, and to apply *Rht13* in wheat breeding programmes using a perfect genetic  
40 marker.

41

## 42 **Introduction**

43 Dwarfing or reduced height genes have been associated with large increases in the yield of  
44 cereals since they were introduced during the Green Revolution (Hedden, 2003). Most  
45 current wheat cultivars carry *Rht-B1b* or *Rht-D1b* which encode negative regulators of  
46 gibberellin (GA) signalling (Peng *et al.*, 1999), resulting in GA insensitivity and reduced  
47 height. These GA insensitive alleles confer benefits to yield by optimising resource  
48 partitioning to the grain and reduced lodging (Thomas, 2017). However they have pleiotropic  
49 effects on growth including reductions in coleoptile length and seedling leaf area (Allan,  
50 1980) and impact resistance to diseases such as fusarium head blight (Srinivasachary *et al.*,  
51 2009). The use of alternative dwarfing genes that do not disrupt GA signalling, and which  
52 can reduce final plant height without adverse effects on seedling growth, will be particularly  
53 relevant in water limited environments (Richards *et al.*, 2010).

54 Several alternative dwarfing loci have been discovered (McIntosh *et al.*, 2020) which are GA  
55 sensitive and could therefore overcome the limitations of *Rht-B1b* and *Rht-D1b* on early  
56 growth. Recently, the causal genes for some of these alternative dwarfing loci have been  
57 identified, revealing their functions in the GA metabolic pathway. The first of these to be  
58 identified was *Rht18*, which is on chromosome 6A and causes an increased expression of a  
59 *GA 2-oxidase* gene (*GA2oxA9*) resulting in the removal of  $GA_{12}$  precursors from the GA  
60 biosynthesis pathway, a reduction of bioactive  $GA_1$  and reduced plant height (Ford *et al.*,  
61 2018). Map position, allelism tests and increased expression of the same *GA 2-oxidase*

62 gene in *Rht14* lines suggested that *Rht14* and *Rht18* are allelic (Haque *et al.*, 2011; Tang,  
63 2016; Ford *et al.*, 2018). Increased expression of related GA 2-oxidase genes was also  
64 found to be responsible for other alternative dwarfing alleles such as *Rht12* (*GA2oxA13* on  
65 chromosome 5A) (Sun *et al.*, 2019; Buss *et al.*, 2020) and *Rht24* (*GA2oxA9* on chromosome  
66 6A, not allelic with *Rht18*) (Tian *et al.*, 2022). These alternative dwarfing genes appear to  
67 operate through a shared mechanism, i.e. reduction of the flux through the GA biosynthetic  
68 pathway and subsequently lower GA content. In addition to GA 2-oxidase genes on  
69 chromosome 5A and 6A, other GA 2-oxidase genes were identified in the wheat genome  
70 (Pearce *et al.*, 2015), suggesting that other dwarfing genes at different positions may also  
71 cause increased expression of other members of the GA 2-oxidase family.

72 *Rht13* is another promising alternative dwarfing gene that reduces final plant height without  
73 affecting seedling growth (Ellis *et al.*, 2004; Rebetzke *et al.*, 2011). The dwarfing allele *Rht-*  
74 *B13b* produced a strong height reduction between 17 % and 34 % compared to *Rht-B13a*,  
75 which is comparable to reductions typical of *Rht-B1b* and *Rht-D1b*, depending on the genetic  
76 background and growing conditions (Rebetzke *et al.*, 2011; Rebetzke *et al.*, 2012; Wang, Y  
77 *et al.*, 2014; Wang *et al.*, 2015; Divashuk *et al.*, 2020). Genetic mapping located *Rht13* on  
78 the long arm of chromosome 7B (Ellis *et al.*, 2005) but the underlying gene has not yet been  
79 identified. Here we describe the causal gene that encodes an autoactive allele of a  
80 *nucleotide-binding site/leucine-rich repeat (NB-LRR)* gene at the *Rht13* locus on  
81 chromosome 7BL. Autoactivation of *Rht13* leads to upregulation of pathogenesis-related  
82 (*PR*) genes, including class III peroxidases, which may catalyse the cross-linking of cell wall  
83 compounds to limit cell elongation and hence reduce height.

## 84 **Methods**

### 85 ***Introduction of Rht13 dwarf allele into different genetic backgrounds***

86 The *Rht13* dwarfing gene was originally generated by C.F. Konzak at Washington State  
87 University in the 1980s by treating the Argentinian wheat Magnif 41 (PI344466) with N-  
88 methyl-N' nitrosourea and selecting a semidwarf line Magnif 41M1 (Konzak, 1982). Seed of  
89 Magnif 41 (AUS17236) and Magnif 41 M1 (AUS17520) was obtained from Winter Cereal  
90 Collection, Tamworth, Australia. Magnif M41 (subsequently called Magnif) and Magnif M41  
91 M1 (subsequently called Magnif M) plants were grown in 20 cm pots containing compost in  
92 the glasshouse maintained under 16 hr light, 23°C day and 16°C night. Internode lengths  
93 were measured at maturity for five plants per genotype.

94 Magnif M was backcrossed into three adapted Australian cultivars (EGA Gregory, Espada  
95 and Magenta) and BC<sub>1</sub>F<sub>3</sub> plants were screened to generate homozygous BC<sub>1</sub>F<sub>4</sub> lines  
96 carrying either a dwarfing allele (*Rht-B13b*, *Rht-B1b* or *Rht-D1b*) or no dwarfing alleles (wild  
97 type alleles: *Rht-B13a*, *Rht-B1a* and *Rht-D1a*). Seed of 1-4 independent F<sub>4</sub> sister lines was  
98 increased from each genotype and background to generate BC<sub>1</sub>F<sub>5</sub> seed for planting in rows  
99 in a field with bird-proof netting (birdcage), Canberra in 2014. Three rows (20 plants/row) of  
100 each genotype/background combination were planted and 5-20 plants were measured for  
101 final height and peduncle length at maturity. Rows of Magnif and Magnif M were also  
102 included in the birdcage experiment.

### 103 ***Genetic mapping of Rht13***

104 A mapping population was generated from a cross between a homozygous short line  
105 carrying *Rht13* (ML45-S) and homozygous tall line (ML80-T); these lines were selected  
106 progeny from a cross between Magnif M and a tall Russian experimental line LAN.  
107 Approximately 2,400 F<sub>2</sub> gametes from ML45-S x ML80-T population were screened by  
108 capillary electrophoresis using simple sequence repeat (SSR) markers *gwm577* (*wms577*)  
109 and *wmc276* that were previously shown to flank the locus (Ellis *et al.*, 2005). By extracting  
110 DNA from half seeds, recombinant embryos were selected for planting and events were  
111 fixed in the F<sub>3</sub> generation before homozygous lines were phenotyped for height in the  
112 glasshouse.

113 To identify additional markers within the genetic interval, parental lines were screened first  
114 with the 9K SNP array (Cavanagh *et al.*, 2013) and then with the 90K array (Wang, S *et al.*,  
115 2014) using the genotyping platform at Agriculture Victoria Research, Bundoora, Victoria.  
116 Additional markers were validated in the recombinants using kompetitive allelic specific PCR  
117 (KASP) assays derived from array markers and additional PCR-based markers  
118 (Supplementary Tables 1 and 2). Fine mapping of *Rht13* benefited from early access in 2013

119 to the physical map of 7B from Chinese Spring that was based on the assembly of bacterial  
120 artificial chromosomes (BACs) from flow sorted chromosomal DNA and coordinated by  
121 University of Life Sciences in Norway and the International Wheat Genome Sequencing  
122 Consortium (IWGSC *et al.*, 2018). We utilised BAC contigs and sequences to generate new  
123 markers in the target interval (Supplementary Tables 1 and 2). Two markers  
124 *7J15.144I10\_2\_2* and *127M17.134P08\_3* that were derived from BAC sequences that  
125 flanked the locus were used to delineate the target region in the whole genome assembly of  
126 CDC Stanley (see Methods: Chrom-seq).

127 A second population from the cross Magnif x Magnif M was generated where the *Rht13*  
128 mutation segregated in a homogenous background. Thirty three F<sub>3</sub>:F<sub>4</sub> lines were tested to  
129 ensure homozygosity at *Rht13* before four short lines and two tall lines were selected for  
130 Chrom-seq and RNA-seq experiments, with an additional two tall lines included in the RNA-  
131 seq experiments to bring the total to four tall lines (see Methods: RNA-seq analysis for  
132 candidate gene identification). The KASP marker which was developed from the functional  
133 SNP at *Rht13* co-segregated with height in 33 homozygous F<sub>4</sub> lines (see Methods:  
134 Validation of *Rht13* in Cadenza mutant).

### 135 **Chromosome-sequencing**

136 To purify and sequence chromosome 7B, we selected four short and two tall progeny  
137 derived from the Magnif x Magnif M cross which had been tested to ensure homozygosity at  
138 *Rht13*. Briefly, suspensions of mitotic metaphase chromosomes were prepared from  
139 synchronized root tip meristem cells following Vrána *et al.* (2000) and Kubaláková *et al.*  
140 (2005). Prior to the flow cytometric analysis, chromosomes were labelled by fluorescence *in*  
141 *situ* hybridization in suspension (FISHIS) using 5'-FITC-GAA<sub>7</sub>-FITC-3' oligonucleotide probe  
142 according to Giorgi *et al.* (2013) and stained by DAPI (4',6-diamidino 2-phenylindole) at 2  
143 µg/mL. Chromosome analysis and sorting was done using FACS Aria II SORP flow  
144 cytometer and sorter (Becton Dickinson Immunocytometry Systems, San José, USA). DAPI  
145 vs. FITC dot plots were acquired for each sample (Supplementary Figure 1) and  
146 chromosomes were sorted at rates of 1500 - 2000 particles per second. 50,000 - 70,000  
147 copies of 7B chromosomes were sorted from each genotype into PCR tubes containing 40  
148 µL sterile deionized water. The sorted chromosome samples were treated with proteinase K,  
149 chromosomal DNA was purified and amplified to 5.4 - 7.9 µg by multiple displacement  
150 amplification (Supplementary Table 3) using an Illustra GenomiPhi V2 DNA Amplification Kit  
151 (GE Healthcare, Chalfont St. Giles, United Kingdom) as described by Šimková *et al.* (2008).  
152 Chromosome content of the sorted fractions was estimated by microscopic analysis of 1500  
153 - 2000 chromosomes sorted onto a microscopic slide. After air-drying, chromosomes were  
154 labelled by FISH with probes for pSc119.2 and Afa family repeats (Molnár *et al.*, 2016) and

155 least 100 chromosomes from each sort run were classified following the karyotype of  
156 Kubaláková *et al.* (2005).

157 The purified DNA from chromosome 7B was sequenced using short-read Illumina 150 bp  
158 paired end reads. The raw reads from the samples were trimmed using trimmomatic v0.32  
159 (Bolger *et al.*, 2014) (parameters: ILLUMINACLIP:TruSeq3-PE.fa:2:30:10:8:TRUE  
160 LEADING:3 TRAILING:3 SLIDINGWINDOW:4:15 MINLEN:36). Trimmed reads were  
161 subsequently mapped to the IWGSC RefSeqv1.0 Chinese Spring (IWGSC *et al.*, 2018) and  
162 the CDC Stanley reference genome sequence (Walkowiak *et al.*, 2020) using HISAT2 v2.1.0  
163 (Kim *et al.*, 2019) (--rg id and --rg were set per sample to enable variant calling). CDC  
164 Stanley was included in the analysis due to poor mapping of Magnif reads to the Chinese  
165 Spring reference genome in the *Rht13* mapping interval. Prior to mapping we divided the  
166 CDC Stanley pseudomolecules each into two parts to make them compatible with  
167 downstream analysis software (see Supplementary Table 4 for details). The output sam file  
168 was sorted using samtools v1.8 (Li *et al.*, 2009), mate pair coordinates added using  
169 samtools fixmate, duplicates removed using samtools markdup and reads mapping to  
170 chromosome 7B part2 were selected using samtools view. We used freebayes v1.2.0  
171 (Garrison & Marth, 2012) to call variants between the samples and the CDC Stanley  
172 reference sequence on chromosome 7B part2, with settings in freebayes only keeping  
173 variants with 2 alleles, using reads with a MAPQ>7 and a base quality >20 (--use-best-n-  
174 alleles 2 --min-mapping-quality 7 --min-base-quality 20). We compared the flanking marker  
175 sequences (obtained from the BAC sequences) to CDC Stanley using blastn in BLAST  
176 v2.9.0 (Camacho *et al.*, 2009) and kept the best hit for each flanking marker (all >98% ID).  
177 This enabled the identification of the physical sequence for the *Rht13* mapping interval in the  
178 CDC Stanley genome. We filtered the freebayes output using vcftools v0.1.15 to retain  
179 variants present within the mapping interval (--from-bp 339467956 --to-bp 341325941),  
180 variants which had 2 alleles (i.e. all samples did not have the same non-ref allele, --min-  
181 alleles 2) and variants with at least 3 reads mapping (--min-meanDP3). We manually  
182 inspected the vcf file to identify homozygous variants between tall and short plants. In total  
183 we identified 13 variants within the mapping interval which were homozygous for one allele  
184 in tall lines and homozygous for a different allele in the short lines.

### 185 ***Alignment between Chinese Spring and CDC Stanley chromosome 7B***

186 Whole chromosome alignments were performed for chromosome 7B of Chinese Spring and  
187 CDC Stanley using MUMmer v4.0 (Marçais *et al.*, 2018) and the nucmer command, with  
188 minimum match set to 1000. For a localized alignment of the *Rht13* region between 705 and  
189 725 Mbp, the minimum match was set to 100. In both cases, the alignments were filtered for  
190 the best alignment, in the case of multiple alignments, and then filtered for a percent identity

191 of 98% or greater. Dotplots were then generated using mummerplot and visualized in  
192 gnuplot v4.6.

### 193 ***RNA-seq analysis for candidate gene identification***

194 We used the same four short and two tall progeny segregating from a Magnif x Magnif M  
195 cross for RNA-seq that were used for Chrom-seq. We included an additional two tall progeny  
196 from the same population which had been tested to ensure homozygosity at *Rht13*. The  
197 basal 25% of elongating peduncles from the main stem were harvested at 50% final length  
198 and immediately frozen in liquid nitrogen. RNA was extracted using Qiagen RNeasy kit and  
199 sequenced using Illumina 150 bp paired end reads. The reads for each sample were  
200 trimmed with trimmomatic v0.32 using the same parameters as for the chrom-seq reads. The  
201 trimmed reads were then aligned to the CDC Stanley pseudomolecules (with each  
202 chromosome divided into two parts) using HISAT2 v2.1.0 with the option `-dta` to facilitate  
203 downstream transcript assembly using StringTie (Pertea *et al.*, 2015). Transcripts were  
204 assembled using StringTie v1.3.3 for each sample individual, before merging the transcript  
205 assemblies using StringTie `--merge`. This produced 70,317 transcripts across all eight  
206 samples. We calculated abundance for each transcript per sample using StringTie  
207 (parameters: `-e -B`) and extracted the count data using the StringTie python script  
208 `prepDE.py`. Upon examination, a principal component analysis plot revealed that one of the  
209 Magnif samples was an outlier from the other three replicates, so this sample was excluded  
210 from further analysis. Differentially expressed genes were identified using DESeq2 1.26.0  
211 (Love *et al.*, 2014), with differentially expressed genes defined as  $\text{padj} < 0.001$ . Only six  
212 transcripts were contained in the *Rht13* mapping interval and only 1 transcript was  
213 differentially expressed. We cross-referenced whether these six transcripts contained any of  
214 the 13 variants identified by chrom-seq.

### 215 ***Annotation of candidate gene as NB-LRR***

216 The candidate gene (*MSTRG.55039*) was annotated on the CDC Stanley reference  
217 assembly (Supplementary file 1). The longest protein sequence was identified using a three  
218 frame forward and reverse translation of the transcript using Expasy (Artimo *et al.*, 2012),  
219 this protein is provided in Supplementary file 1. We searched the NCBI database using  
220 `blastp` for similar protein sequences, all of the top hits were NB-LRR genes, but the  
221 maximum percentage ID was only 66.5 %. We identified the position of the NB-ARC and  
222 LRR domain using the NCBI conserved domain database (Marchler-Bauer *et al.*, 2017)  
223 (Supplementary file 1).

## 224 **RNA-seq analysis to understand biological role of *Rht13***

225 Using the DESeq2 results, we considered genes to be differentially expressed where padj  
226 <0.001 and expression was >2 fold up/downregulated between short and tall samples.  
227 *Pathogenesis related (PR)* gene sequences reported in Zhang *et al.* (2017) were  
228 downloaded from NCBI and were identified in our StringTie transcript assembly by using  
229 blastn (BLAST v2.9.0), keeping the best hit.

## 230 **Gene Ontology (GO) term enrichment**

231 To annotate the StringTie transcript assembly with GO terms we used blastn (BLAST v2.9.0)  
232 (Camacho *et al.*, 2009) to identify the best hit in the Chinese Spring RefSeqv1.1 annotation  
233 (IWGSC *et al.*, 2018). For transcripts which were >95 % identical across >200 bp, the GO  
234 terms were transferred from Chinese Spring to the StringTie assembly. In total  
235 43,685/59,228 genes were assigned a GO term using this approach. GO term enrichment  
236 analysis was carried out separately for upregulated and downregulated genes using goseq  
237 v1.38.0 (Young *et al.*, 2010). The resulting GO term list were summarised using Revigo  
238 (Supek *et al.*, 2011) on the medium setting (0.7) using rice (*Oryza sativa*) GO term sizes.

## 239 **Identification of class III peroxidases**

240 We used the list of class III peroxidase genes identified by Yan *et al.* (2019) in the Chinese  
241 Spring survey sequence. We extracted coding sequence for each class III peroxidase gene  
242 and used blastn (BLAST v2.9.0) (Camacho *et al.*, 2009) to identify corresponding sequences  
243 in our StringTie transcript assembly for the Magnif samples. We filtered the results to only  
244 keep hits >95 % identical with a length >400 bp. After removing duplicate transcripts, we had  
245 242 transcripts from 219 genes. Of these 219 genes, 29 were 2-fold upregulated padj  
246 <0.001. To confirm the identity of these 29 differentially expressed genes as class III  
247 peroxidases we used RedoxiBase (Savelli *et al.*, 2019) to carry out a blastx of their  
248 transcripts against the Peroxibase curated peptide database. One of the differentially  
249 expressed genes was annotated as an ascorbate peroxidase by RedoxiBase so it was  
250 excluded, while the other 28 genes were confirmed to be class III peroxidases.

## 251 **Validation of *Rht13* in Cadenza mutants**

252 We searched for the mutation identified in Magnif M in the Cadenza TILLING population  
253 (Krasileva *et al.*, 2017). The candidate gene was not present in the Chinese Spring  
254 reference sequence (best BLAST hit TraesCS7B02G452600, 79 % identity) so we could not  
255 use the mapped mutations at PlantsEnsembl (Howe *et al.*, 2020). Instead, we used  
256 [www.wheat-tilling.com](http://www.wheat-tilling.com) (Krasileva *et al.*, 2017) which includes mutations called on *de novo*  
257 assembled contigs, which may not be present in Chinese Spring. The best BLAST hit to the  
258 candidate gene genomic sequence was on contig TGAC\_Cadenza\_U\_ctg7180000823280,



259 which had 100 % identity across 3,987 bp, including the entire CDS. We annotated the gene  
260 present on this contig and we identified Cad0453, which contained the same point mutation  
261 resulting in the identical amino acid as the Magnif M lines (Supplementary file 1). We used  
262 Polymarker (Ramirez-Gonzalez *et al.*, 2015b) to develop a primer to distinguish the wild type  
263 and mutant allele using KASP genotyping (LGC Genomics). The primer sequences were:  
264 forward primer mutant (*Rht-B13b*) allele: ctgctatgggtgtgctctT, forward primer wild type (*Rht-*  
265 *B13a*) allele: ctgctatgggtgtgctctC, common reverse primer: cctctcagagctgctcaa. The  
266 standard FAM/HEX compatible tails were added at the 5' end and the target SNP was  
267 present at the 3' end (Ramirez-Gonzalez *et al.*, 2015a).

### 268 ***Phenotyping and genotyping of Cadenza0453 mutants***

269 Twenty seeds from the M<sub>5</sub> line of Cadenza0453 was grown in a growth chamber with 16 hr  
270 light, 20°C day, 16°C night. DNA was extracted following a protocol from [www.wheat-](http://www.wheat-training.com)  
271 [training.com](http://www.wheat-training.com) (Training, nd), adapted from Pallotta *et al.* (2003). KASP assays were  
272 performed as previously described (Ramirez-Gonzalez *et al.*, 2015a) using the primers  
273 above. Plant height was measured once final height was reached (Zadoks stage 85). Ear,  
274 peduncle, and individual internode lengths were recorded for six homozygous wild type (*Rht-*  
275 *B13a*) individuals and eight homozygous mutant (*Rht-B13b*) individuals.

### 276 ***Validation of Rht13 transgene in Fielder background***

#### 277 *Constructs and transformation*

278 The pVecBar-Rht13 construct contained a 6,998 bp fragment including 2,532 bp upstream  
279 and 450 bp downstream regions amplified from Magnif mutant genomic DNA using primers  
280 Rht13-NotF2 (5' AATGCGGCCGCAATCGATAGGAGAGCTGCGTCTGTGTG 3') and Rht13-  
281 AscR2 (5' TCGGTACGGCGCGCCGAGAGTGCCTTGCCAGTTC 3') with Phusion® High-  
282 Fidelity DNA Polymerase (NEB, USA). pVecBarIII is a derivative of pWBvec8 (Wang *et al.*,  
283 1998), in which the 35S hygromycin gene was replaced by the bialaphos resistance gene  
284 (bar). The wheat cultivar Fielder was transformed using the *Agrobacterium tumefaciens*  
285 strain GV3101 (pMP90) as described in Richardson *et al.* (2014). T<sub>0</sub> and T<sub>1</sub> transformants  
286 were tested for the presence of transgenes by PCR using primers F698 (5'  
287 AGGTCCTTGTGACCGAAATG 3') and R1483 (5' CAGTGAGCCTTTCCTGTTCC 3').

288 To identify the copy number of transgenes in transgenic plants, genomic DNA from individual  
289 T<sub>1</sub> segregating plants from transgenic events were used for DNA gel blot hybridisation as  
290 described in Mago *et al.* (2015). DNA was digested with HindIII and a part of the selectable  
291 marker gene 'bar' was used as a probe.

## 292 *Gene expression*

293 Expression of the transgene was done using qRT-PCR analysis. Leaf tissue was collected  
294 from individual plants of a segregating T<sub>1</sub> family at stem elongation stage (Zadoks stage 33).  
295 RNA extraction was done using RNeasy kit (Qiagen) according to manufacturer's  
296 instructions. Quantitative PCR was carried out on a Bio-Rad CFX96 Touch Real-Time PCR  
297 Detection System (Bio-Rad) using iTaq universal SYBR Green supermix (Bio-Rad) and a  
298 two-step cycling program according to the manufacturer's instructions and as described in  
299 Moore *et al.* (2015). Minus RT controls were first tested with housekeeping gene *TaCON*  
300 (Moore *et al.*, 2015) to ensure amplification of residual genomic DNA was insignificant.  
301 Primers qrht13-2F: 5' GCAAAGGTTGAACTACTGTTCC 3' and qrht13-2R: 5'  
302 AACATCACAAAACGAACATGGA 3' were used for quantification of *Rht13* transcript. The  
303 green channel was used for data acquisition. Efficiency and cycle threshold values were  
304 calculated using the LinRegPCR quantitative PCR data analysis (Ruijter *et al.*, 2009), and  
305 relative expression levels were calculated using the relative expression software tool (REST)  
306 method (Pfaffl, 2001) relative to the housekeeper gene *TaCON*.

## 307 *Phenotyping*

308 For phenotyping of the transgenic plants, ten T<sub>1</sub> progeny seeds from 4 independent T<sub>0</sub> plants  
309 were sown in 13 cm pots containing compost in a glasshouse maintained under 16 hr light,  
310 23°C day and 16°C night. Plant height was measured at maturity (~Zadoks' stage 70-80).

## 311 ***Transient expression in tobacco***

312 The coding sequence for the wild type (*Rht-B13a*) and mutant (*Rht-B13b*) allele of *Rht13*  
313 were synthesised (Twist Bioscience) and cloned into the Gateway binary vector pGWB12  
314 with an N-terminal FLAG tag (Nakagawa *et al.*, 2007). These were transformed into  
315 *Agrobacterium tumefaciens* (strain AGL-1) by electroporation. Transformed colonies were  
316 selected from agar plates supplemented with 50 µg/ml kanamycin and 50 µg/ml rifampicin  
317 and inoculated into liquid LB media with 50 µg/ml kanamycin and 50 µg/ml rifampicin.  
318 Cultures were incubated at 28°C in a shaking incubator for 24 hrs. Agrobacterial cells were  
319 harvested by centrifugation and resuspended in MMA solution [10 mM MES (2-[N-  
320 morpholino]ethanesulfonic acid) at pH 5.6, 10 mM MgCl<sub>2</sub> and 150 µM acetosyringone] to a  
321 OD<sub>600</sub> of 3. After incubation in the dark for 1 hr, the agrobacterial suspension was infiltrated  
322 into 4 to 5 week old *Nicotiana bethamiana* leaves. Photographs were taken 6 days after  
323 infiltration. The *N. bethamiana* plants were grown in M3 compost (Levington) mixed 3:1 with  
324 perlite under 12 hr light at 20°C day, 16°C night in a growth cabinet.

### 325 ***Pathogenesis-related (PR) gene expression***

326 Cadenza0453 plants that were homozygous for the *Rht13* wild type (*Rht-B13a*) or  
327 homozygous mutant (*Rht-B13b*) allele were grown as described above. Tissues were  
328 harvested at seven days after anthesis and snap frozen in liquid nitrogen. Four biological  
329 replicates were harvested for each tissue: flag leaf blade (central 3 cm), basal peduncle  
330 (bottom 3 cm, flag leaf sheath removed before snap freezing) and apical peduncle (top 3 cm  
331 of peduncle tissue just below the rachis node). RNA was extracted using the RNeasy Plant  
332 Mini Kit (Qiagen) according to the protocol from the manufacturer, using the RLT buffer.  
333 Genomic DNA was digested by RQ1 RNase-free DNase (Promega) according to the  
334 manufacturer's instructions. cDNA was synthesised using the AffinityScript Multiple  
335 Temperature cDNA Synthesis Kit (Agilent) with random primers according to the  
336 manufacturer's instructions with a synthesis temperature of 55°C.

337 qPCR was carried out with 3-4 biological replicates with 3 technical replicates per reaction.  
338 Primers for *PR3* and *PR4* were from Zhang *et al.* (2017) and for *actin* were from Uauy *et al.*  
339 (2006). qPCR was carried out using PowerUp SYBR Green (Applied Biosystems) according  
340 to the manufacturer's instructions with each primer at a final concentration of 0.25 µM and  
341 0.5 µL of cDNA in a 10 µL reaction, using 384 well plates. The qPCR programme run on the  
342 QuantStudio5 (ThermoFisher) was as follows: pre-incubation at 50°C for 2 min and 95°C for  
343 2 min; 40 amplification cycles of 95°C for 15 s, 58°C for 15 s, and 72°C for 1 min. The final  
344 melt-curve step heated to 95°C for 15 s, cooled to 60°C for 1 min and then heated to 95°C  
345 with continuous reading as the temperature increased.

346 All qPCR reaction melt curves were inspected to have only a single product. Crossing  
347 thresholds were calculated using the QuantStudio5 software (ThermoFisher). Expression  
348 level was calculated relative to *actin* using the Pfaffl method which accounts for primer  
349 efficiency (Pfaffl, 2001). Primer efficiencies were calculated using a serial dilution of cDNA.

### 350 ***Hydrogen peroxide quantification***

351 Hydrogen peroxide content was measured in elongating peduncles (50% final length) of  
352 Magnif and Magnif M using the protocol described in Amplex Red Hydrogen Peroxide Kit  
353 (Invitrogen). Plants were grown in a glasshouse as described in the section "Methods:  
354 Introduction of *Rht13* dwarf allele into different genetic backgrounds". 30 mg of ground tissue  
355 was resuspended in the reaction buffer and spun down before adding it to the reaction  
356 mixture. Fluorescence was detected at 590 nm after 30 min incubation. The experiment  
357 using 3 replicates was repeated and both experiments with 6 replicates in total were used for  
358 the Student's t-test.

### 359 **Cell length measurements**

360 Magnif M and Magnif were grown in the glasshouse as described in the previous section,  
361 until the peduncles were fully-expanded and five individual plants of each genotype were  
362 used for analysis. One 10 cm segment was collected from the most basal part of each  
363 peduncle from the primary tiller and harvested into 70% ethanol and stored at 4°C. Before  
364 further cell length analysis, all peduncles were cleared for up to 14 days in 10% household  
365 bleach, then transferred back into 70% ethanol and stored at 4°C.

366 For analysis of epidermal cell lengths, a 1-cm-long segment was cut from the top of each  
367 segment of harvested, cleared peduncle, i.e. a segment between 9 and 10 cm from the base  
368 of the peduncle. Segments were transferred through 4 changes of 100% dry ethanol then  
369 dried in a Tousimis Autosamdri critical point drier and mounted on stubs for examination  
370 using a Zeiss EVO LS15 scanning electron microscope. Epidermal cell lengths were  
371 detected using the backscatter detector with 30 kV accelerating voltage in 10 Pa chamber  
372 pressure (Talbot & White, 2013). Cell lengths were measured using Zeiss Zen Blue software  
373 and analysed in MS Excel. Two distinct cell types were measured: inter-hair cells and single  
374 cells (Supplementary Figure 2).

### 375 **Analysis of physical properties of peduncles**

376 Magnif M and Magnif were grown to maturity in a glasshouse maintained at 23°C day-time  
377 temperature, with 18°C night-time temperature, as described previously. Fully mature, dried  
378 stems were used for testing to avoid confounding effects of water content, with 11-12  
379 independent primary stems sampled per genotype. A three-point bend test was carried out  
380 on the peduncles to determine bending rigidity and bending strength as described in Hyles *et*  
381 *al.* (2017).

### 382 **Peduncle histochemical analysis**

383 Cadenza0453 plants that were homozygous wild type (*Rht-B13a*) or homozygous mutant  
384 (*Rht-B13b*) were grown under speed breeding conditions in a controlled environment  
385 cabinet: 22 hrs light, 2 hrs dark, 20°C day, 15°C night, 70% humidity. Peduncles were  
386 harvested 3-7 days after anthesis. Fresh sections were cut by hand from the peduncle using  
387 a razor blade from three regions: the apical peduncle immediately under the node to the ear,  
388 the mid-point of the peduncle half way between the ear and the flag leaf node, and the basal  
389 part of the peduncle just above the flag leaf node (the flag leaf sheath was removed). The  
390 sections treated with toluidine blue O or phloroglucinol-HCl as described in Pradhan Mitra  
391 and Loqué (2014) and imaged with bright-field illumination (magnification of 20X).

## 392 Results

### 393 **Characterisation of *Rht13* phenotype in *Magnif***

394 The *Rht13* semidwarfing gene was originally identified as an induced mutant in the *Magnif*  
395 background (Konzak, 1982). We carried out a detailed characterisation and found that *Rht13*  
396 caused a 30-35% height reduction in both greenhouse and field conditions (birdcage)  
397 (Figure 1). A comparison of internode lengths showed that most of the height reduction  
398 occurred in the peduncle and this effect was confirmed in field grown plants that were  
399 measured for height from early stem elongation to maturity (Figure 1c, d). Height differences  
400 were apparent after Zadoks growth stage 50, with reduced peduncle length accounting for  
401 most of the effect.

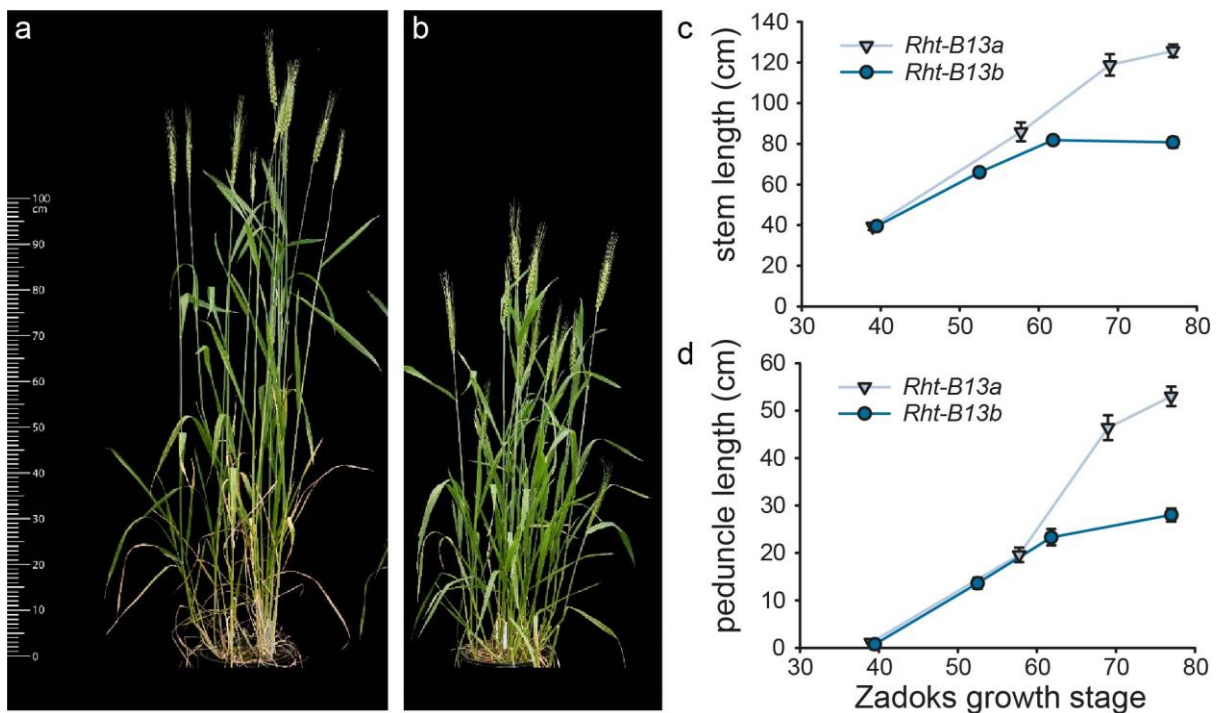

402

403 **Figure 1.** Phenotypic characteristics of *Magnif* (*Rht-B13a*) and *Magnif M* (*Rht-B13b*). a)  
404 *Magnif* and b) *Magnif M* grown under greenhouse conditions. Developmental time-course of  
405 c) stem length and d) peduncle length in wheat grown under field conditions. Data points  
406 combine measurements from 5-10 individual field grown plants. The error bars represent the  
407 standard error of the mean.

408

409

410

### 411 ***Fine genetic mapping of Rht13 to a region on chromosome 7B***

412 Previously, *Rht13* was mapped to the long arm of chromosome 7B and genetically linked to  
413 SSR marker *gwm577* (Ellis *et al.*, 2005). An F<sub>2</sub> population from a cross between parental  
414 lines ML45-S carrying *Rht13* and tall line ML80-T was developed for fine mapping.  
415 Approximately 2,400 F<sub>2</sub> gametes were screened with SSR markers *gwm577* and *wmc276*  
416 that were previously shown to flank the locus. The screen identified 21 recombinants that  
417 corresponded to less than 1 cM of genetic distance between flanking markers (Figure 2a,  
418 Supplementary Table 2). Additional DNA markers were added to the genetic interval after  
419 parental lines were screened with the 9K and 90K wheat SNP arrays (Cavanagh *et al.*, 2013;  
420 Wang, S *et al.*, 2014). In addition, the project was given early access in 2013 to the  
421 emerging physical map of chromosome 7B, which was part of the international initiative to  
422 generate maps of individual Chinese Spring chromosomes led by the IWGSC and  
423 Norwegian University of Life Sciences. Several BAC clones were assigned to the region and  
424 markers that were developed from BAC sequences were added to the interval  
425 (Supplementary Table 2). BAC sequence-derived markers *7J15.144I10\_2\_2* and  
426 *127M17.134P08\_3* flanked the *Rht13* locus on the proximal and the distal side, respectively,  
427 and defined a genetic interval of approx. 0.1 cM (Figure 2).

### 428 ***Next generation sequencing approaches revealed a single amino acid change*** 429 ***between expressed genes in the region on chromosome 7B***

430 The *Rht13* region defined by flanking markers *7J15.144I10\_2\_2* and *127M17.134P08\_3*  
431 corresponded to a 1.93 Mb interval on chromosome 7B in Chinese Spring RefSeqv1.0. To  
432 identify candidate SNPs in the interval, we generated an additional population from a Magnif  
433 x Magnif M cross and selected four short and two tall F<sub>3</sub>:F<sub>4</sub> lines that were homozygous at  
434 *Rht13*. For each of these lines, we isolated chromosome 7B by flow sorting and then  
435 sequenced the chromosome using Illumina short-reads. We attempted to identify SNPs  
436 within the mapping interval by mapping this chrom-seq data to the RefSeqv1.0 genome  
437 sequence (IWGSC *et al.*, 2018) but we found that over half of the 1.93 Mb interval had few  
438 reads mapping (1.07/1.93 Mb), which suggested haplotype divergence between Chinese  
439 Spring and Magnif. We then examined the alignment of chromosome 7B between Chinese  
440 Spring and several cultivars whose genome sequences were available from the 10+ Wheat  
441 Genomes Project (Walkowiak *et al.*, 2020). We found that CDC Stanley had significant  
442 haplotype divergence from Chinese Spring in the *Rht13* interval on chromosome 7B  
443 (Supplementary Figure 3); therefore we tested whether CDC Stanley would be a more  
444 appropriate reference sequence. Using CDC Stanley as the reference, the flanking markers  
445 spanned 1.86 Mb on chromosome 7B (Figure 2b). Within this interval, a 0.49 Mb region had

446 more SNPs between all samples and the reference sequence, suggesting some divergence  
447 between CDC Stanley and Magnif.

448 We identified 12 SNPs and 1 INDEL between the tall and short fixed lines in the mapping  
449 interval (Figure 2c). To identify potential causal genes for *Rht13*, we carried out RNA-seq on  
450 developing peduncle tissues from four fixed short and four fixed tall F<sub>3</sub>:F<sub>4</sub> lines from the  
451 same Magnif x Magnif M population that was used for chrom-seq. We found that one  
452 transcript within the interval was more highly expressed in Magnif M than Magnif samples  
453 (2.5-fold change, padj <0.001; indicated by \* in Figure 2d). However, this transcript did not  
454 translate to a protein longer than 76 amino acids in any frame, suggesting that  
455 pseudogenisation might have occurred. Since there were no obvious changes in expression  
456 levels of genes within the interval, except the putative pseudogene, we examined whether  
457 the SNPs detected by chrom-seq were contained within any of the transcripts. We found that  
458 only 1 SNP (G to A at chr7B:714,391,008) was located within a transcript (Figure 2e) and  
459 this SNP was predicted to cause an amino acid change within the conserved RNBS-A motif  
460 of the predicted protein sequence (Figure 2f). A KASP marker developed for the SNP co-  
461 segregated with the height phenotype in the Magnif x Magnif M population (Supplementary  
462 Figure 4).

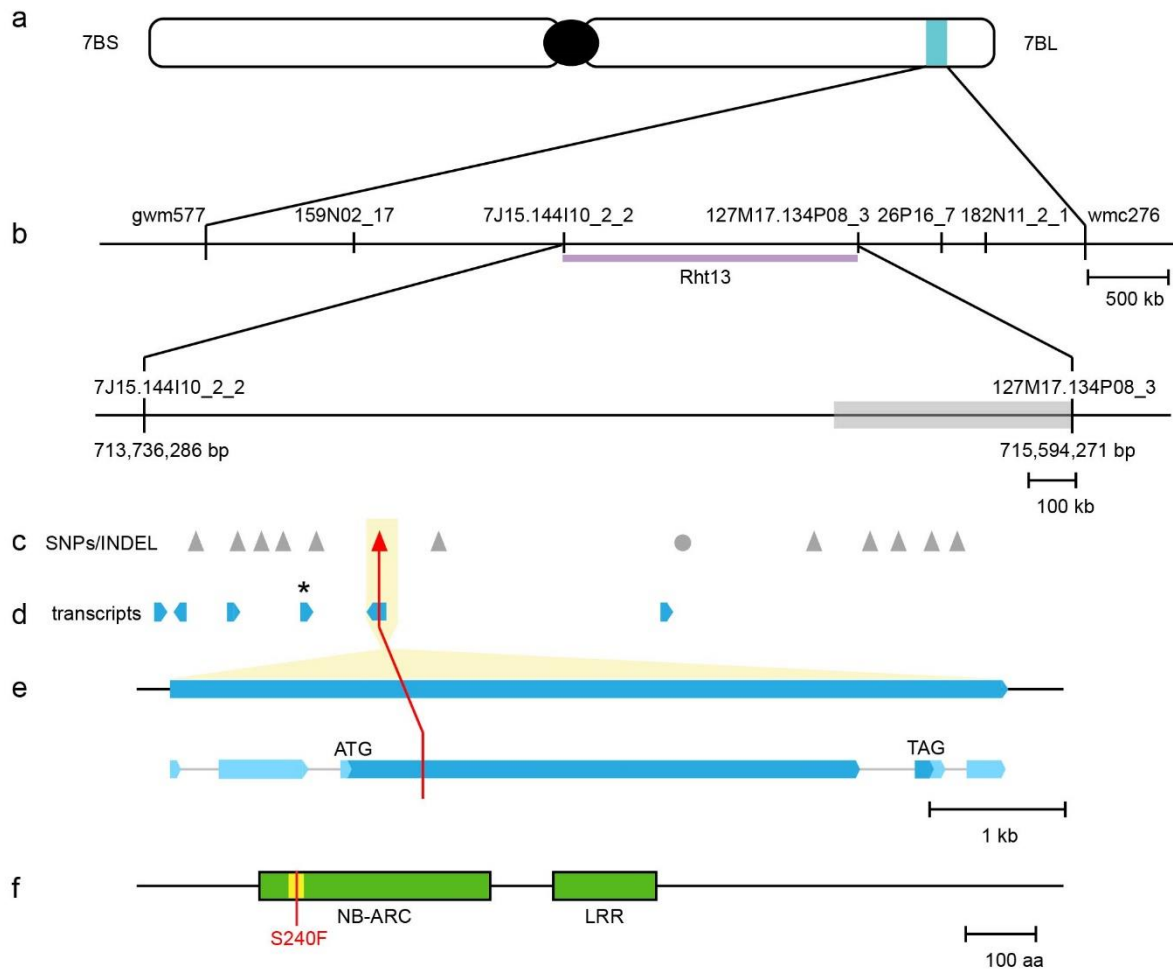

463

464 **Figure 2.** Mapping of the NB-LRR gene *Rht13*. a) *Rht13* is located on the long arm of  
 465 chromosome 7B. b) Physical mapping interval in CDC Stanley with genetic markers (SSR  
 466 and BAC derived). The distal region (grey box) contained more SNPs between all samples  
 467 and the reference sequence. c) SNPs (triangles) and INDEL (circle) between tall and short  
 468 progeny from a Magnif x Magnif M cross, identified by chrom-seq. Red triangle indicates  
 469 amino acid change inducing SNP. d) Transcripts identified by RNA-seq of progeny from a  
 470 Magnif x Magnif M cross. The asterisk indicates a significantly differentially expressed  
 471 transcript between tall and short progeny. e) Intron-exon structure of gene encoded by  
 472 *Rht13*. Exons are represented by boxes, with untranslated regions in pale blue and coding  
 473 regions in darker blue, introns are represented by thin grey lines. f) The gene encodes a  
 474 1,272 amino acid protein containing an NB-ARC and LRR domain and is annotated as  
 475 MSTRG.55039 (Supplementary File 1). Magnif M has a mutation (S240F) in the RNBS-A  
 476 motif (yellow).



477 ***The amino acid change S240F reduces plant height***

478 The expressed transcript with an amino acid change was predicted to encode a nucleotide-  
479 binding site/leucine-rich repeat (NB-LRR) protein (Figure 2f). The mutation was predicted to  
480 cause an amino acid substitution of the serine at position 240 to phenylalanine (S240F) in  
481 the RNBS-A motif (Meyers *et al.*, 2003). To test whether this amino acid change caused the  
482 reduced height phenotype observed in Magnif M, we searched the Cadenza TILLING  
483 population for mutations within closely related genes (Krasileva *et al.*, 2017). Line  
484 Cadenza0453 was identified as carrying a gene that was 100% identical at the nucleotide  
485 level to the mutant NB-LRR gene at the *Rht13* locus, resulting in the same amino acid  
486 change (S240F) as found in Magnif M. The KASP marker developed for the mutation  
487 segregated within progeny derived from Cadenza0453. Homozygous mutant plants (*Rht-*  
488 *B13b*) were on average 16.7 cm shorter than homozygous wild type plants (*Rht-B13a*) at  
489 maturity in the Cad0453 background (Figure 3a, b;  $p < 0.001$ , Student's t-test). This difference  
490 in height was reflected in shorter peduncle and internode lengths, except for the first  
491 internode (Supplementary Table 5).

492 To confirm that the amino acid change caused the reduction in height, we transformed the  
493 mutant allele from Magnif M (*Rht-B13b*) into Fielder (Figure 3c-e). We found that expression  
494 of the transgene caused a strong reduction in height, compared to null segregants (Figure  
495 3c-e and Supplementary Table 6), although there was variation in the degree of dwarfism,  
496 which did not relate to the copy number or expression levels (Supplementary Figure 5 and  
497 Supplementary Table 6).

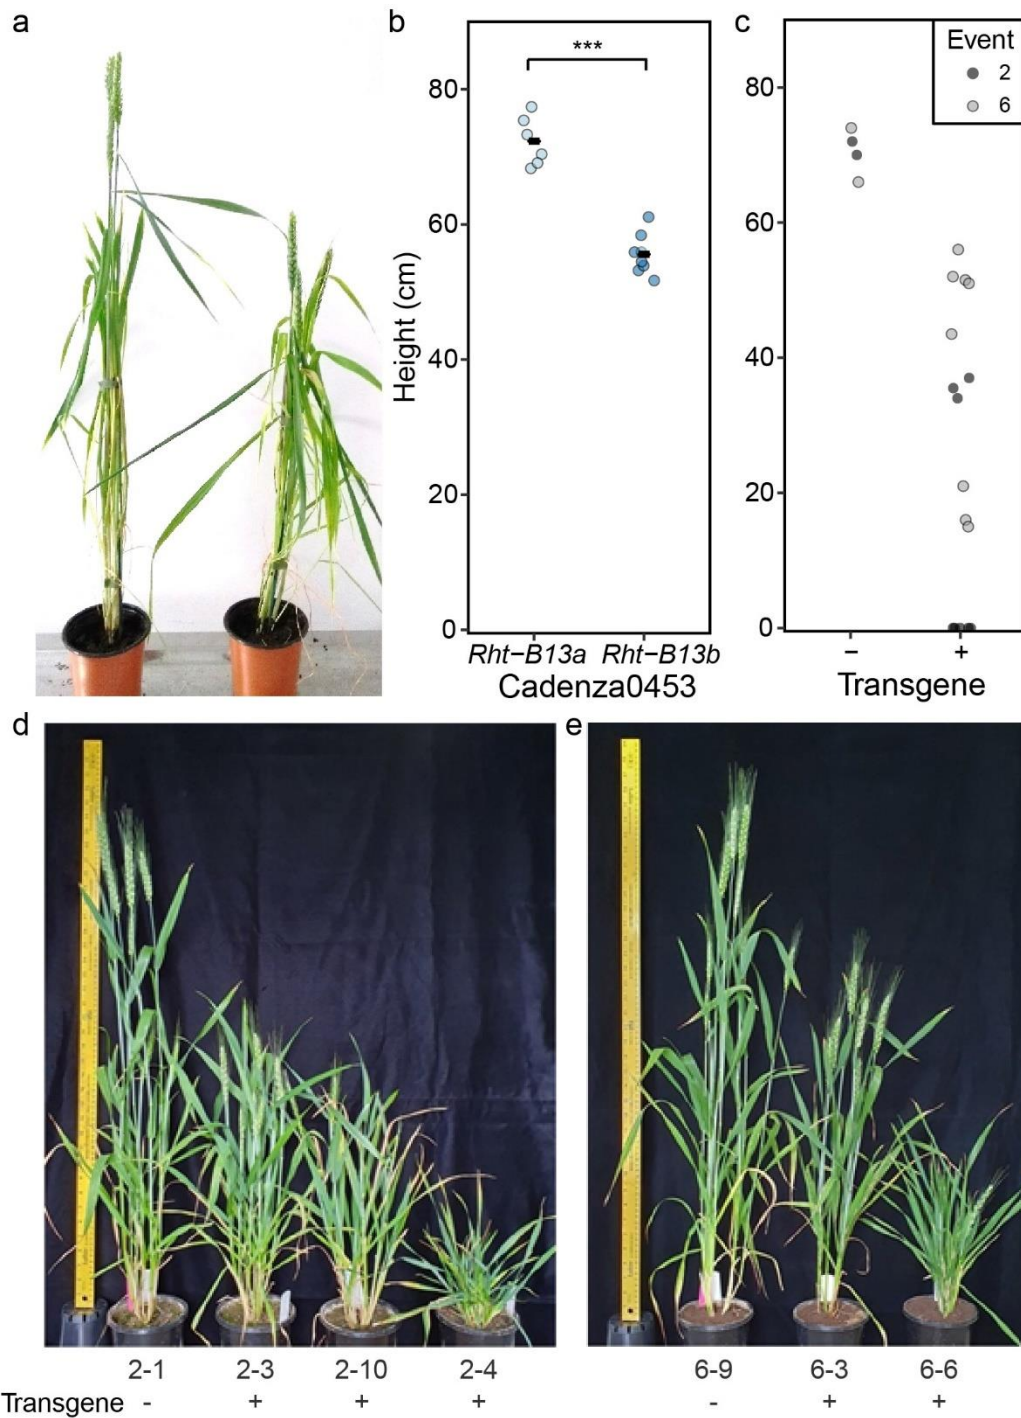

498

499 **Figure 3.** Validation that the S240F mutation in *Rht-B13b* causes a reduction in height. a)  
 500 Cadenza0453 segregates for plants homozygous for the wild type allele *Rht-B13a* (left) and  
 501 mutant allele *Rht-B13b* (right) and b) Cadenza0453 height quantification, the black bars  
 502 represent the mean, \*\*\*  $p < 0.001$ , Student's t-test. c) Height of T<sub>1</sub> progeny of two transgenic  
 503 events (family 2 and 6) in Fielder background transformed with *Rht-B13b* allele, stunted  
 504 plants are represented by points immediately above the x-axis (details in Supplementary  
 505 Table 6). d) and e) show families 2 and 6 respectively. Null segregants (-) are on the left of  
 506 each image.

507 **Characterisation of the *Rht13* reduced height phenotype in different genetic**  
508 **backgrounds**

509 To assess the potential for use of *Rht-B13b* in breeding programmes, we generated sister  
510 lines for *Rht13* in three Australian elite backgrounds, alongside *Rht-B1b* (in EGA Gregory) or  
511 *Rht-D1b* (in Espada and Magenta) dwarfing alleles for comparison. We found that *Rht-B13b*  
512 stems elongated earlier than *Rht-B1b* or *Rht-D1b* stems, but final lengths were shorter than  
513 the tall sister lines due to an earlier arrest in growth (Figure 4a-c). This lower final length is  
514 largely due to the peduncle being shorter in *Rht-B13b* than in *Rht-B1b* or *Rht-D1b* plants  
515 (Figure 4d-f). No differences in spike length were observed. We found some differences in  
516 the effect between cultivars. In Magenta, *Rht13* is a stronger dwarfing gene than *Rht-D1b*  
517 (shorter peduncle, no difference in lower internodes; Figure 4c and f), whilst in Espada and  
518 EGA Gregory the effect of *Rht-B13b* on height is comparable to *Rht-D1b* and *Rht-B1b*  
519 (Figure 4a, b, d and e). Comparing *Rht-B13b* to tall plants lacking conventional dwarfing  
520 genes, the reductions in heights are larger in Magenta and EGA Gregory than Espada.  
521 Taken together, our results (Figures 1, 3 and 4) show that *Rht-B13b* is effective at reducing  
522 height in a range of genetic backgrounds including lines from the UK (Cadenza), Australia  
523 (Espada, EGA Gregory and Magenta), Argentina (Magnif) and the US (Fielder).

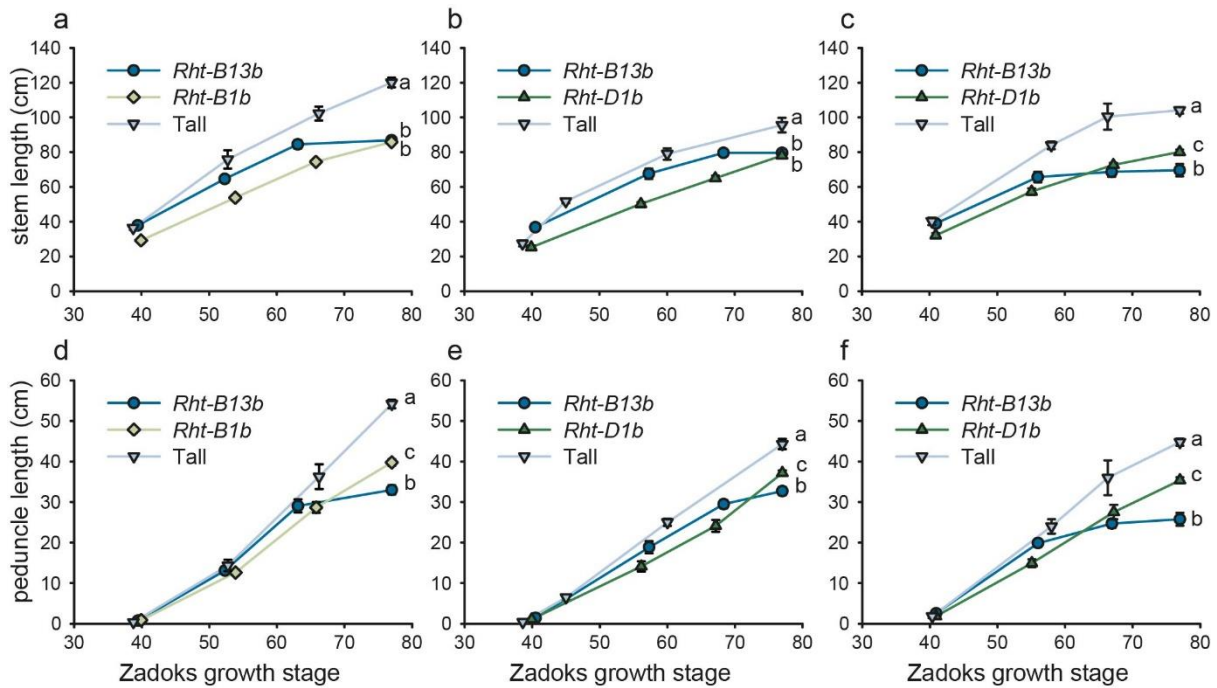

524

525 **Figure 4.** Effect of *Rht-B13b* and conventional dwarfing alleles *Rht-B1b* and *Rht-D1b* on  
526 stem and peduncle length in different wheat backgrounds in the field. a-c) stem length, d-f)  
527 peduncle length, a and d) EGA Gregory, b and e) Espada and c and f) Magenta. Letters  
528 indicate significant differences at maturity determined by a one-way ANOVA followed by  
529 Tukey post-hoc test ( $p < 0.05$ ). Data points combine measurements from 5-20 individual field  
530 grown plants. The error bars represent the standard error of the mean.

531

### 532 ***Rht-B13b* is autoactive and causes a cell death response in *Nicotiana*** 533 ***benthamiana***

534 The mutation causing the reduction in height (S240F; see figure 2f above) occurred in the  
535 RNBS-A domain of the NB-LRR protein at the same position as a mutation observed in the  
536 tomato (*Lycopersicon esculentum*) NB-LRR protein I-2 (Figure 5a). In I-2 the mutation  
537 converting the serine (S) residue to a phenylalanine (F) caused autoactivation of the protein  
538 (Tameling *et al.*, 2006). Therefore, we hypothesised that the S240F mutation in *Rht13* would  
539 also result in autoactivation of the NB-LRR protein, upregulating defense responses and  
540 reducing plant growth. We first tested this through heterologous expression of the wild type  
541 (*Rht-B13a*) and mutant *Rht13* gene (*Rht-B13b*) in tobacco leaves. We found that the *Rht-*  
542 *B13b* allele induced more cell death 5 days post inoculation than the *Rht-B13a* allele (Figure  
543 5b), which is a typical defense response to pathogen invasion.

544

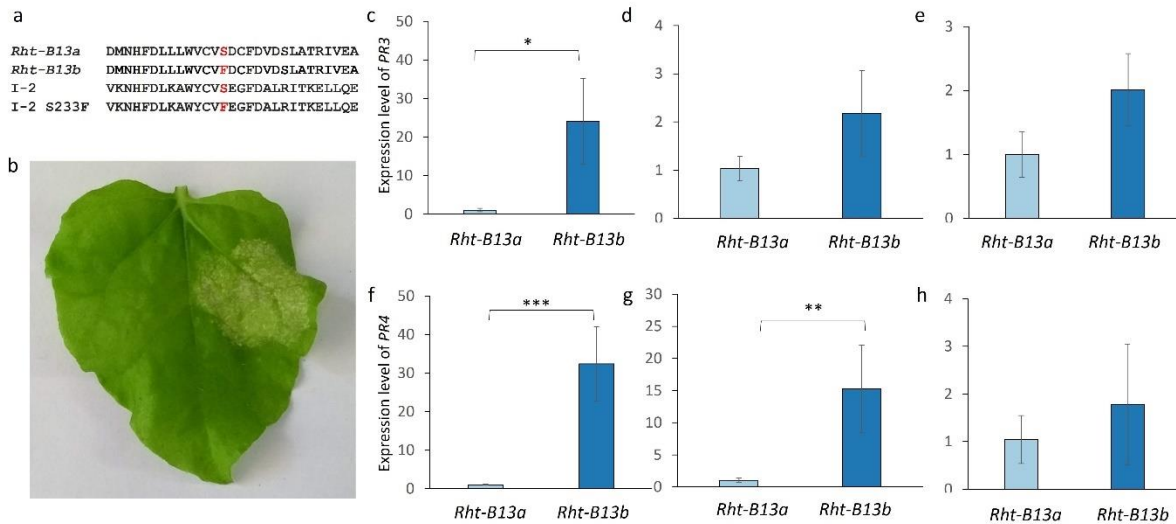

545

546 **Figure 5.** *Rht-B13b* induces defense gene responses in *Nicotiana benthamiana* and wheat.

547 a) Alignment of the RNBS-A motif from *Rht-B13a* and *Rht-B13b* protein with the tomato I-2  
548 protein and the I-2 mutant (S233F) that induces auto-activation. b) Infiltration of *Rht-B13b*  
549 into *N. benthamiana* induces significantly more cell death (right side of leaf) than *Rht-B13a*  
550 (left side of leaf, no cell death observed). The experiment was repeated twice, on six plants  
551 each time, a representative result is shown 6 days post inoculation. Expression of *PR* genes  
552 in wheat basal peduncle (c,f), apical peduncle (d,g) and flag leaf blade (e,h). Expression  
553 measured for *PR3* (c-e) and *PR4* (f-h) and normalised to *actin*. For each graph the  
554 expression level is normalised to be 1 in *Rht-B13a*, error bars represent the standard error  
555 (n=3-4). Significant differences were calculated using a t-test on log transformed values, \*  
556 p<0.05, \*\* p<0.01, \*\*\* p<0.001.

557

558 Cell death responses associated with *Rht-B13b* were not observed in any of the wheat  
559 backgrounds. It is possible that autoactivation of *Rht13* in wheat might nevertheless enhance  
560 defense responses leading to a reduction in growth, without leading to cell death. We found  
561 that the expression level of *pathogenesis-related* genes (*PR* genes) *PR3* and *PR4* were >20  
562 fold upregulated in the basal peduncle in the *Rht-B13b* mutant compared to the *Rht-B13a*  
563 wild type sibling Cadenza0453 (Figure 5c, f), suggesting that autoactivation of defense  
564 responses occurred in the *Rht13* mutant plants in rapidly expanding tissue. *PR4* was 15-fold  
565 upregulated in the apical peduncle but no significant difference was observed in *PR3*  
566 expression (Figure 5d, g). No differences were observed in *PR* gene expression between  
567 *Rht-B13b* and *Rht-B13a* in the flag leaf blade (Figure 5e, h).

568

569 ***RNA-seq analysis reveals that class III peroxidases are upregulated by***  
570 ***autoactive Rht13***

571 To further explore the pathways through which *Rht13* reduces height we used the same  
572 RNA-seq data from peduncle samples of fixed lines from the Magnif x Magnif M population,  
573 which was previously used to identify the causal gene (see Figure 2). We confirmed that *PR*  
574 genes were upregulated in Magnif M (*Rht-B13b*) compared to Magnif (*Rht-B13a*)  
575 (Supplementary Figure 6), similar to observations in Cadenza (Figure 5c-h). The fold  
576 changes observed were higher in the RNA-seq data (Supplementary Figure 6) than the  
577 qPCR data (Figure 5c-h); however, *PR4* upregulation was only borderline significant  
578 ( $p=0.05$ ). The upregulation of *PR* genes was consistent with upregulation of defense  
579 response associated genes in the Magnif M plants compared to Magnif, identified by GO  
580 term enrichment (Supplementary Figure 7). Overall, we found that more genes were  
581 upregulated (1,560 genes) than downregulated (726 genes) in Magnif M compared to Magnif  
582 ( $>2$  fold,  $\text{padj} < 0.001$ ). Upregulated genes were enriched for GO terms including defense  
583 responses, cell wall organization, regulation of hydrogen peroxide metabolic processes and  
584 salicylic acid biosynthetic processes. We did not detect any enrichment for genes related to  
585 GA signalling or biosynthesis. Downregulated genes were associated with flavonoid  
586 biosynthetic processes, responses to cytokinin and photosynthesis (Supplementary Figure  
587 7).

588 We further hypothesised that the autoactivation of defense responses in the mutant line will  
589 cause the production of reactive oxygen species, which can promote cross-linking and cell  
590 wall stiffening leading to less growth (Schopfer, 1996; Schmidt *et al.*, 2016). To investigate  
591 this, we examined the expression of class III peroxidases that can use hydrogen peroxide in  
592 cross-linking reactions during cell wall organization and pathogen defense (Smirnoff &  
593 Arnaud, 2019). We identified 218 class III peroxidases that were expressed in Magnif or  
594 Magnif M peduncle samples. Of these, 28 were significantly upregulated in Magnif M (*Rht-*  
595 *B13b*) compared to Magnif (*Rht-B13a*) in the peduncle ( $\text{padj} < 0.001$ ,  $> 2$ -fold, Figure 6a),  
596 which is a significantly greater proportion than would be expected for a set of 218 random  
597 genes (12.8 % vs 2.6 %, Chi-squared test,  $p < 0.001$ ). Furthermore, many of the class III  
598 peroxidase genes were very strongly upregulated (11/28 are upregulated  $> 10$  fold).

599 We found that Magnif M (*Rht-B13b*) peduncles had lower hydrogen peroxide content than  
600 Magnif (*Rht-B13a*) (Figure 6b,  $p < 0.05$ , Student's t-test), consistent with upregulation of class  
601 III peroxidases in the mutant (Figure 6a). To test whether these gene expression and  
602 metabolite changes influence cell wall mechanical properties, we used a 3-point bend test to  
603 measure peduncle strength and rigidity. We found that the Magnif M (*Rht-B13b*) peduncles  
604 were stronger and more rigid than Magnif (*Rht-B13a*) peduncles (Figure 6c, d,  $p = 0.02$  and

605 p = 0.003 respectively, Student's t-test). The Magnif M (*Rht-B13b*) peduncles had shorter  
606 cell lengths in their epidermis, with cell lengths of approximately 2/3 of wild type, suggesting  
607 a lower level of cell expansion (Figure 6e). To investigate whether these mechanical  
608 changes are mediated by changes to lignification, we examined cross sections of the  
609 peduncle taken from the apical part of the peduncle immediately under the ear, the mid-point  
610 of the peduncle, and the basal part of the peduncle just above the node. Using toluidine blue  
611 we did not observe any obvious morphological changes (Figure 6f) and no significant  
612 differences in lignification were observed between Magnif and Magnif M in the apical or  
613 middle peduncle (Figure 6g). However, the basal sections of Magnif M (*Rht-B13b*) peduncles  
614 had much lower staining of lignin in and around vascular bundles than the Magnif (*Rht-B13a*)  
615 (Figure 6g).

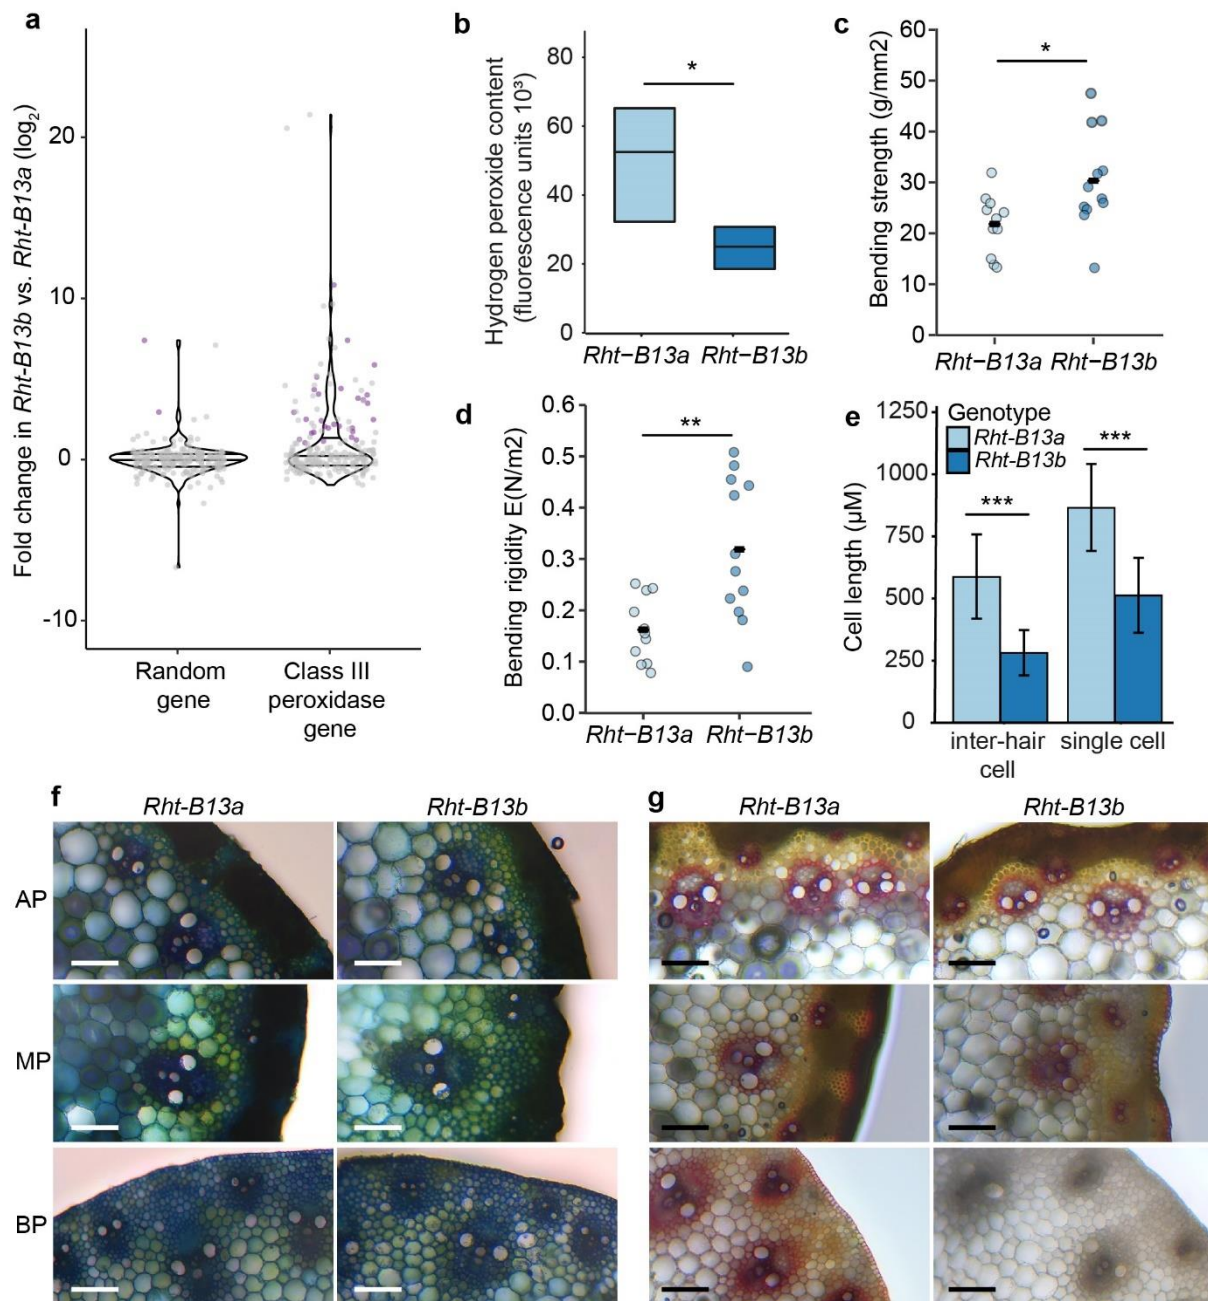

616

617 **Figure 6.** Changes in class III peroxidase gene expression, hydrogen peroxide content,  
 618 mechanical and cell properties in mutant (*Rht-B13b*) compared to wild type (*Rht-B13a*)  
 619 peduncles. a-e) are in a Magnif background, f) and g) are in a Cadenza background. a) Fold  
 620 change in expression of 218 class III peroxidase genes compared to an equivalent number  
 621 of randomly selected genes. Purple dots represent genes differentially expressed at  
 622  $p_{adj} < 0.001$  with a fold change  $> 2$ , grey dots are not differentially expressed, lines across the  
 623 violin plot represent quartile 1, the median and quartile 3. b) Hydrogen peroxide content in  
 624 elongating peduncles. Significant differences determined by Student's t-test,  $n=6$ . Peduncle  
 625 bending strength c) and bending rigidity d) were determined using a 3-point bend test,  
 626 significant differences were determined using Student's t-tests,  $n=11-12$ . e) Epidermal cell



627 lengths in inter-hair and single cells, significant differences determined by ANOVA, n=62-190  
628 individual cells. f) and g) transverse sections imaged with bright-field illumination  
629 (magnification 20X) from the apical peduncle (AP) 1 cm below the ear, the peduncle mid-  
630 point (MP) and the basal peduncle (BP) 1 cm above the node. f) is stained with toluidine blue  
631 O and g) with phloroglucinol-HCl. One representative image from 5 independent biological  
632 replicates is shown. Asterisks indicate statistical differences between genotypes: \*  $p < 0.05$  ,  
633 \*\*  $p < 0.01$ , \*\*\*  $p < 0.001$ .

634

635

## 636 Discussion

### 637 ***Novel mechanism for a wheat Rht gene***

638 A striking difference to other reported *Rht* genes in wheat is that *Rht13* is not directly  
639 involved in GA signalling or metabolism, as is the case for conventional dwarfing genes *Rht-*  
640 *B1b* and *Rht-D1b* (Peng *et al.*, 1999) and the cloned alternative dwarfing genes *Rht12* (Buss  
641 *et al.*, 2020), *Rht18* (Ford *et al.*, 2018) and *Rht24* (Tian *et al.*, 2022). Instead, *Rht13* is a *NB-*  
642 *LRR* gene with a point mutation that induces autoactivation. The amino acid change in *Rht13*  
643 is the same mutation as previously characterised in the tomato protein I-2 which impeded  
644 ATP hydrolysis and promoted an ATP-bound active form of the protein (Tameling *et al.*,  
645 2006). Due to the high conservation between the RNBS-A motif between I-2 and *Rht13*, we  
646 hypothesise that the mutation in *Rht13* has the same biochemical function to impede ATP  
647 hydrolysis, consistent with the hypersensitive response (HR) we observed upon expressing  
648 *Rht-B13b* in *N. benthamiana* leaves.

649 Autoactive *NB-LRR* genes have been reported to reduce growth in several plant species  
650 (Yang & Hua, 2004; Chintamanani *et al.*, 2010; Roberts *et al.*, 2013), including causing  
651 reduced internode length in flax (Howles *et al.*, 2005). However, these autoactive *NB-LRRs*  
652 are often associated with negative pleiotropic effects including a spontaneous HR resulting  
653 in necrotic lesions. We did not observe any spontaneous HR or necrosis in any of the wheat  
654 genetic backgrounds tested. This contrasts with known autoactive *NB-LRR* genes in cereals  
655 that reduce height, such as *Rp1-D21* in maize which induces a spontaneous HR in a range  
656 of genetic backgrounds, although to differing degrees of severity (Chintamanani *et al.*, 2010).  
657 Nevertheless, *Rht-B13b* induced a HR in tobacco, which could be a result of high transient  
658 expression in tobacco, although overexpression of *Rht-B13b* in wheat did not cause a HR  
659 despite severe stunting. Instead, it is possible that tissue specific expression of *Rht13* in  
660 wheat or differences in signalling pathway thresholds between tobacco and wheat may  
661 explain these differences. This is supported by our finding that *PR* genes were only

662 upregulated in peduncle tissues, and not in the flag leaves of Cadenza *Rht-B13b*. The  
663 upregulation of *PR* genes in *Rht-B13b* containing wheat raises the question whether *Rht-*  
664 *B13b* could also enhance resistance response to certain pathogens. Autoactive mutants in  
665 flax, potato and tomato were shown to gain additional specificities to strains of the same  
666 pathogen or became effective against other pathogen species (Howles *et al.*, 2005; Farnham  
667 & Baulcombe, 2006; Giannakopoulou *et al.*, 2015), but further research will be required to  
668 determine any association between *Rht-B13b* and enhanced disease resistance.

669 Amongst the *PR* genes upregulated by *Rht-B13b* are class III peroxidases which are known  
670 to act in a wide range of physiological processes, including cross-linking of cell wall  
671 components, formation of lignin and metabolism of reactive oxygen species such as  
672 hydrogen peroxide (Smirnoff & Arnaud, 2019). The upregulation of class III peroxidases is  
673 associated with a decrease in hydrogen peroxide in *Rht-B13b*, which may be due to its use  
674 in cell wall cross-linking. Increased cross-linking could explain the reduced cell lengths  
675 observed in *Rht-B13b* and the increase in peduncle strength and rigidity. Surprisingly, we did  
676 not observe an increase in lignin in *Rht-B13b* compared to wild type, suggesting that these  
677 changes in cell size and tissue strength may be mediated by cross-linking polysaccharides  
678 and extensins other than lignin. Alternatively, subtle differences in lignin content may not be  
679 detectable by histochemical staining in the middle section of the peduncle, where differences  
680 in bending strength were observed. Taken together, we present a model through which *Rht-*  
681 *B13b* operates (Figure 7). In this model, the upregulation of class III peroxidases promotes  
682 cross-linking of cell walls in the tissues of *Rht-B13b* carriers, constraining cell elongation and  
683 ultimately reducing height.

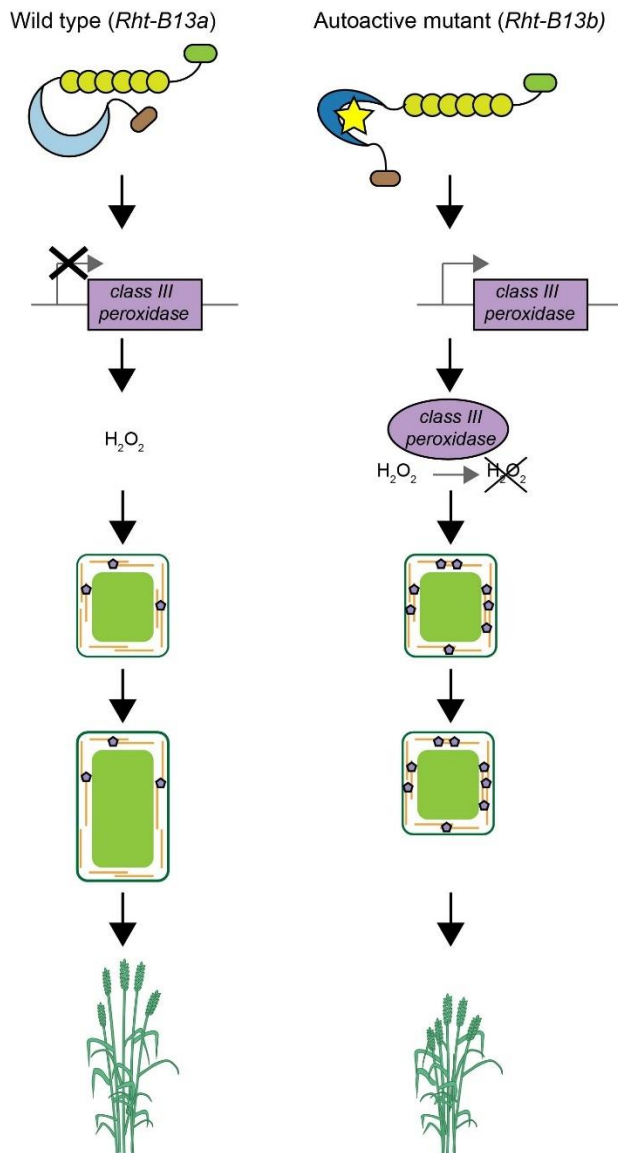

684

685 **Figure 7.** Model of pathway through which *Rht-B13b* causes semidwarfism. In a wild type  
686 plant (*Rht-B13a*, left) the NB-LRR protein is inactive resulting in normal cell wall cross-  
687 linking, cell expansion and growth. In the autoactive mutant (*Rht-B13b*, right), pathogenesis-  
688 related genes including class III peroxidases are upregulated in expanding tissues. Class III  
689 peroxidases use H<sub>2</sub>O<sub>2</sub> to increase cell wall cross-linking which results in reduced cell  
690 expansion and growth.

691

### 692 **Applications in agriculture**

693 *Rht13* is effective in multiple genetic backgrounds and provides a height reduction similar to  
694 conventional dwarfing genes *Rht-B1b* and *Rht-D1b*. *Rht13* dwarfism is not associated with  
695 reduced seedling growth or coleoptile length and most of the height reducing effect occurs  
696 later in development (after Zadoks stage 50) which is mainly associated with reduction in

697 peduncle growth. Therefore, the gene is well suited to water-limiting environments that  
698 require deeper planting to access available moisture and rapid leaf area development to  
699 lower evaporative losses from the soil surface. We found that *Rht-B13b* increased bending  
700 strength which may further decrease lodging and reduce yield losses compared to  
701 conventional *Rht* genes. Deployment of *Rht-B13b* will be facilitated by the use of a perfect  
702 KASP marker for selection of the allele in breeding programmes. It is possible that *Rht-B13b*  
703 mutation is already circulating in some breeding materials, for example in the WM-800 eight-  
704 way MAGIC population of European winter wheat cultivars, a significant QTL was identified  
705 on chromosome 7B, for which the peak SNP marker maps only 10 Mb away from the  
706 location of *Rht13* (Sannemann *et al.*, 2018). However, no height QTL were identified on  
707 chromosome 7B in other MAGIC populations including a diverse UK 16 founder MAGIC  
708 population (Scott *et al.*, 2021) and an Australian 4 way magic population (Huang *et al.*,  
709 2012).

710 In conclusion, the identification of a *NB-LRR* gene underlying an alternative dwarfing gene in  
711 wheat has provided insight into an alternative pathway, where GA biosynthesis or signalling  
712 is not directly affected. This discovery will open up new opportunities to alter height,  
713 potentially through engineering of autoactive *NB-LRR* genes and cell wall enzymes. More  
714 knowledge will be needed to establish whether the activation of defense responses by *Rht-*  
715 *B13b* could influence disease resistance.

716

## 717 **Author contributions**

718 Conceptualization: PB, WS

719 Data curation: PB, BF

720 Formal analysis: PB, WB, BF, CJP, WS, RW, SW, SJW, TX

721 Funding acquisition: PB, WS

722 Investigation: PB, DB, AD, JD, BF, JH, CM, IM, RM, RW, TX, XX

723 Methodology: PB, WS

724 Project administration: PB, WS

725 Resources: PB, WDB, OAO, WS

726 Supervision: PB, WS

727 Visualization: PB, WB, SW

728 Writing-original draft: PB

729 Writing-review and editing: PB, WB, WDB, AD, JD, BF, JH, IM, RM, OAO, CJP, WS, RW,

730 SW, SJW, TX

731

## 732 **Data availability**

733 The data that supports the findings of this study are available in the supplementary material  
734 of this article and raw reads for the chromosome-seq and RNA-seq are deposited as  
735 PRJEB51492 in the European Nucleotide Archive.

## 736 **Acknowledgements**

737 We thank Zbigniew Stachurski for assistance with stem physical property measurements  
738 and Bujie Zhan for assistance with BAC libraries. We thank Jan Vrána, Zdeňka Dubská,  
739 Romana Šperková and Jitka Weiserová for assistance with chromosome sorting and DNA  
740 amplification. This research was supported by the NBI Research Computing group through  
741 HPC resources.

## 742 **Funding**

743 This work was supported by CSIRO and by the UK Biotechnology and Biological Science  
744 Research Council (BBSRC) through the Designing Future Wheat Institute Strategic  
745 Programme (BB/P016855/1). PB acknowledges funding from the Rank Prize New Lecturer  
746 Award and a Royal Society Research Grant (RGS\R1\191163). IM was supported from  
747 Marie Curie Fellowship grant award 'AEGILWHEAT' (H2020-MSCA-IF-2016-746253), JD  
748 was supported from ERDF project "Plants as a tool for sustainable global development" (No.  
749 CZ.02.1.01/0.0/0.0/16\_019/0000827). OAO thanks Graminor AS and the Norwegian  
750 Research Council (NFR) for financial support for NFR project 199387 at the Norwegian  
751 University of Life Sciences.

752

## 753 **References**

- 754 **Allan RE. 1980.** Influence of semidwarfism and genetic background on stand establishment  
755 of wheat. *Crop Science* **20**(5): 634-638.
- 756 **Artimo P, Jonnalagedda M, Arnold K, Baratin D, Csardi G, de Castro E, Duvaud S,**  
757 **Flegel V, Fortier A, Gasteiger E, et al. 2012.** ExPASy: SIB bioinformatics resource  
758 portal. *Nucleic Acids Research* **40**(W1): W597-W603.
- 759 **Bolger AM, Lohse M, Usadel B. 2014.** Trimmomatic: a flexible trimmer for Illumina  
760 sequence data. *Bioinformatics* **30**(15): 2114-2120.
- 761 **Buss W, Ford BA, Foo E, Schnippenkoetter W, Borrill P, Brooks B, Ashton AR,**  
762 **Chandler PM, Spielmeier W. 2020.** Overgrowth mutants determine the causal role  
763 of gibberellin *GA2oxidaseA13* in *Rht12* dwarfism of wheat. *Journal of Experimental*  
764 *Botany* **71**(22): 7171-7178.
- 765 **Camacho C, Coulouris G, Avagyan V, Ma N, Papadopoulos J, Bealer K, Madden TL.**  
766 **2009.** BLAST+: architecture and applications. *BMC Bioinformatics* **10**: 421.
- 767 **Cavanagh CR, Chao S, Wang S, Huang BE, Stephen S, Kiani S, Forrest K, Saintenac C,**  
768 **Brown-Guedira GL, Akhunova A, et al. 2013.** Genome-wide comparative diversity  
769 uncovers multiple targets of selection for improvement in hexaploid wheat landraces  
770 and cultivars. *Proceedings of the National Academy of Sciences* **110**(20): 8057-8062.

- 771 **Chintamanani S, Hulbert SH, Johal GS, Balint-Kurti PJ. 2010.** Identification of a maize  
772 locus that modulates the hypersensitive defense response, using mutant-assisted  
773 gene identification and characterization. *Genetics* **184**(3): 813-825.
- 774 **Divashuk MG, Kroupin PY, Shirnin SY, Vukovic M, Kroupina AY, Karlov GI. 2020.** Effect  
775 of gibberellin responsive reduced height allele *Rht13* on agronomic traits in spring  
776 bread wheat in field experiment in non-black soil zone. *Agronomy* **10**(7): 927.
- 777 **Ellis MH, Rebetzke GJ, Azanza F, Richards RA, Spielmeier W. 2005.** Molecular mapping  
778 of gibberellin-responsive dwarfing genes in bread wheat. *Theoretical and Applied*  
779 *Genetics* **111**(3): 423-430.
- 780 **Ellis MH, Rebetzke GJ, Chandler P, Bonnett D, Spielmeier W, Richards RA. 2004.** The  
781 effect of different height reducing genes on the early growth of wheat. *Functional*  
782 *Plant Biology* **31**(6): 583-589.
- 783 **Farnham G, Baulcombe DC. 2006.** Artificial evolution extends the spectrum of viruses that  
784 are targeted by a disease-resistance gene from potato. *Proceedings of the National*  
785 *Academy of Sciences* **103**(49): 18828-18833.
- 786 **Ford BA, Foo E, Sharwood R, Karafiátová M, Vrána J, MacMillan C, Nichols DS,**  
787 **Steuernagel B, Uauy C, Doležel J, et al. 2018.** *Rht18* semidwarfism in wheat is due  
788 to increased *GA 2-oxidaseA9* expression and reduced GA content. *Plant Physiology*  
789 **177**(1): 168-180.
- 790 **Garrison E, Marth G. 2012.** Haplotype-based variant detection from short-read sequencing.  
791 *arXiv preprint*. arXiv:1207.3907 [q-bio.GN].
- 792 **Giannakopoulou A, Steele JFC, Segretin ME, Bozkurt TO, Zhou J, Robatzek S,**  
793 **Banfield MJ, Pais M, Kamoun S. 2015.** Tomato I2 immune receptor can be  
794 engineered to confer partial resistance to the oomycete *Phytophthora infestans* in  
795 addition to the fungus *Fusarium oxysporum*. *Molecular Plant-Microbe Interactions*  
796 **28**(12): 1316-1329.
- 797 **Giorgi D, Farina A, Grosso V, Gennaro A, Ceoloni C, Lucretti S. 2013.** FISHIS:  
798 fluorescence in situ hybridization in suspension and chromosome flow sorting made  
799 easy. *PLOS ONE* **8**(2): e57994-e57994.
- 800 **Haque M, Martinek P, Watanabe N, Kuboyama T. 2011.** Genetic mapping of gibberellic  
801 acid-sensitive genes for semi-dwarfism in durum wheat. *Cereal Research*  
802 *Communications* **39**(2): 171-178.
- 803 **Hedden P. 2003.** The genes of the Green Revolution. *Trends in Genetics* **19**(1): 5-9.
- 804 **Howe KL, Contreras-Moreira B, De Silva N, Maslen G, Akanni W, Allen J, Alvarez-**  
805 **Jarreta J, Barba M, Bolser DM, Cambell L, et al. 2020.** Ensembl Genomes 2020—  
806 enabling non-vertebrate genomic research. *Nucleic Acids Research* **48**(D1): D689-  
807 D695.
- 808 **Howles P, Lawrence G, Finnegan J, McFadden H, Ayliffe M, Dodds P, Ellis J. 2005.**  
809 Autoactive alleles of the flax *L6* rust resistance gene induce non-race-specific rust  
810 resistance associated with the hypersensitive response. *Mol Plant Microbe Interact*  
811 **18**(6): 570-582.
- 812 **Huang BE, George AW, Forrest KL, Kilian A, Hayden MJ, Morell MK, Cavanagh CR.**  
813 **2012.** A multiparent advanced generation inter-cross population for genetic analysis  
814 in wheat. *Plant Biotechnology Journal* **10**(7): 826-839.
- 815 **Hyles J, Vautrin S, Pettolino F, MacMillan C, Stachurski Z, Breen J, Berges H, Wicker**  
816 **T, Spielmeier W. 2017.** Repeat-length variation in a wheat cellulose synthase-like  
817 gene is associated with altered tiller number and stem cell wall composition. *Journal*  
818 *of Experimental Botany* **68**(7): 1519-1529.
- 819 **IWGSC, Appels R, Eversole K, Stein N, Feuillet C, Keller B, Rogers J, Pozniak CJ,**  
820 **Choulet F, Distelfeld A, et al. 2018.** Shifting the limits in wheat research and  
821 breeding using a fully annotated reference genome. *Science* **361**(6403): eaar7191.
- 822 **Kim D, Paggi JM, Park C, Bennett C, Salzberg SL. 2019.** Graph-based genome alignment  
823 and genotyping with HISAT2 and HISAT-genotype. *Nature Biotechnology* **37**(8): 907-  
824 915.

- 825 **Konzak C. 1982.** Evaluation and genetic analysis of semi-dwarf mutants of wheat. *In Semi-*  
826 *Dwarf Cereal Mutants and Their Use in Cross-Breeding: Research Coordination*  
827 *Meeting 1981. International Atomic Energy Agency, Vienna, Austria:* 25–37.
- 828 **Krasileva KV, Vasquez-Gross HA, Howell T, Bailey P, Paraiso F, Clissold L, Simmonds**  
829 **J, Ramirez-Gonzalez RH, Wang X, Borrill P, et al. 2017.** Uncovering hidden  
830 variation in polyploid wheat. *Proceedings of the National Academy of Sciences*  
831 **114(6):** E913-E921.
- 832 **Kubaláková M, Kovárová P, Suchánková P, Cíhalíková J, Bartos J, Lucretti S,**  
833 **Watanabe N, Kianian SF, Dolezel J. 2005.** Chromosome sorting in tetraploid wheat  
834 and its potential for genome analysis. *Genetics* **170(2):** 823-829.
- 835 **Li H, Handsaker B, Wysoker A, Fennell T, Ruan J, Homer N, Marth G, Abecasis G,**  
836 **Durbin R. 2009.** The Sequence Alignment/Map format and SAMtools. *Bioinformatics*  
837 **25(16):** 2078-2079.
- 838 **Love MI, Huber W, Anders S. 2014.** Moderated estimation of fold change and dispersion  
839 for RNA-seq data with DESeq2. *Genome Biology* **15(12):** 550.
- 840 **Mago R, Zhang P, Vautrin S, Šimková H, Bansal U, Luo M-C, Rouse M, Karaoglu H,**  
841 **Periyannan S, Kolmer J, et al. 2015.** The wheat *Sr50* gene reveals rich diversity at  
842 a cereal disease resistance locus. *Nature Plants* **1(12):** 15186.
- 843 **Marçais G, Delcher AL, Phillippy AM, Coston R, Salzberg SL, Zimin A. 2018.** MUMmer4:  
844 A fast and versatile genome alignment system. *PLOS Computational Biology* **14(1):**  
845 e1005944.
- 846 **Marchler-Bauer A, Bo Y, Han L, He J, Lanczycki CJ, Lu S, Chitsaz F, Derbyshire MK,**  
847 **Geer RC, Gonzales NR, et al. 2017.** CDD/SPARCLE: functional classification of  
848 proteins via subfamily domain architectures. *Nucleic Acids Research* **45(D1):** D200-  
849 D203.
- 850 **McIntosh RA, Dubcovsky J, Rogers WJ, Xia XC, Raupp WJ. 2020.** Catalogue of Gene  
851 Symbols for Wheat. <https://wheat.pw.usda.gov/GG3/WGC>.
- 852 **Meyers BC, Kozik A, Griego A, Kuang H, Michelmore RW. 2003.** Genome-wide analysis  
853 of NBS-LRR–encoding genes in Arabidopsis. *The Plant cell* **15(4):** 809-834.
- 854 **Molnár I, Vrána J, Burešová V, Cápál P, Farkas A, Darkó É, Cseh A, Kubaláková M,**  
855 **Molnár-Láng M, Doležel J. 2016.** Dissecting the U, M, S and C genomes of wild  
856 relatives of bread wheat (*Aegilops* spp.) into chromosomes and exploring their  
857 synteny with wheat. *The Plant Journal* **88(3):** 452-467.
- 858 **Moore JW, Herrera-Foessel S, Lan C, Schnippenkoetter W, Ayliffe M, Huerta-Espino J,**  
859 **Lillemo M, Viccars L, Milne R, Periyannan S, et al. 2015.** A recently evolved  
860 hexose transporter variant confers resistance to multiple pathogens in wheat. *Nature*  
861 *Genetics* **47(12):** 1494-1498.
- 862 **Nakagawa T, Kurose T, Hino T, Tanaka K, Kawamukai M, Niwa Y, Toyooka K,**  
863 **Matsuoka K, Jinbo T, Kimura T. 2007.** Development of series of gateway binary  
864 vectors, pGWBs, for realizing efficient construction of fusion genes for plant  
865 transformation. *Journal of Bioscience and Bioengineering* **104(1):** 34-41.
- 866 **Pallotta M, Warner P, Fox R, Kuchel H, Jefferies S, Langridge P 2003.** Marker assisted  
867 wheat breeding in the southern region of Australia. *Proceedings of the 10th*  
868 *international wheat genetics symposium, Paestum, Italy: Istituto Sperimentale per la*  
869 *Cerealicoltura Roma, Italy.* 789-791.
- 870 **Pearce S, Huttly AK, Prosser IM, Li Y-d, Vaughan SP, Gallova B, Patil A, Coghill JA,**  
871 **Dubcovsky J, Hedden P, et al. 2015.** Heterologous expression and transcript  
872 analysis of gibberellin biosynthetic genes of grasses reveals novel functionality in the  
873 *GA3ox* family. *BMC Plant Biology* **15(1):** 130.
- 874 **Peng J, Richards DE, Hartley NM, Murphy GP, Devos KM, Flintham JE, Beales J, Fish**  
875 **LJ, Worland AJ, Pelica F, et al. 1999.** ‘Green revolution’ genes encode mutant  
876 gibberellin response modulators. *Nature* **400(6741):** 256-261.
- 877 **Perteua M, Perteua GM, Antonescu CM, Chang T-C, Mendell JT, Salzberg SL. 2015.**  
878 StringTie enables improved reconstruction of a transcriptome from RNA-seq reads.  
879 *Nature Biotechnology* **33(3):** 290-295.

- 880 **Pfaffl MW. 2001.** A new mathematical model for relative quantification in real-time RT–PCR.  
881 *Nucleic Acids Research* **29**(9): e45–e45.
- 882 **Pradhan Mitra P, Loqué D. 2014.** Histochemical staining of *Arabidopsis thaliana* secondary  
883 cell wall elements. *Journal of visualized experiments : JoVE*(87): 51381.
- 884 **Ramirez-Gonzalez RH, Segovia V, Bird N, Fenwick P, Holdgate S, Berry S, Jack P,**  
885 **Caccamo M, Uauy C. 2015a.** RNA-Seq bulked segregant analysis enables the  
886 identification of high-resolution genetic markers for breeding in hexaploid wheat.  
887 *Plant Biotechnology Journal* **13**(5): 613-624.
- 888 **Ramirez-Gonzalez RH, Uauy C, Caccamo M. 2015b.** PolyMarker: A fast polyploid primer  
889 design pipeline. *Bioinformatics* **31**(12): 2038-2039.
- 890 **Rebetzke GJ, Ellis MH, Bonnett DG, Condon AG, Falk D, Richards RA. 2011.** The *Rht13*  
891 dwarfing gene reduces peduncle length and plant height to increase grain number  
892 and yield of wheat. *Field Crops Research* **124**(3): 323-331.
- 893 **Rebetzke GJ, Ellis MH, Bonnett DG, Mickelson B, Condon AG, Richards RA. 2012.**  
894 Height reduction and agronomic performance for selected gibberellin-responsive  
895 dwarfing genes in bread wheat (*Triticum aestivum* L.). *Field Crops Research* **126**: 87-  
896 96.
- 897 **Richards RA, Rebetzke GJ, Watt M, Condon AG, Spielmeyer W, Dolferus R. 2010.**  
898 Breeding for improved water productivity in temperate cereals: phenotyping,  
899 quantitative trait loci, markers and the selection environment. *Functional Plant*  
900 *Biology* **37**(2): 85-97.
- 901 **Richardson T, Thistleton J, Higgins TJ, Howitt C, Ayliffe M. 2014.** Efficient  
902 Agrobacterium transformation of elite wheat germplasm without selection. *Plant Cell,*  
903 *Tissue and Organ Culture* **119**(3): 647-659.
- 904 **Roberts M, Tang S, Stallmann A, Dangl JL, Bonardi V. 2013.** Genetic requirements for  
905 signaling from an autoactive plant NB-LRR intracellular Innate immune receptor.  
906 *PLOS Genetics* **9**(4): e1003465.
- 907 **Ruijter JM, Ramakers C, Hoogaars WMH, Karlen Y, Bakker O, van den Hoff MJB,**  
908 **Moorman AFM. 2009.** Amplification efficiency: linking baseline and bias in the  
909 analysis of quantitative PCR data. *Nucleic Acids Research* **37**(6): e45-e45.
- 910 **Sannemann W, Lisker A, Maurer A, Léon J, Kazman E, Cöster H, Holzapfel J, Kempf H,**  
911 **Korzun V, Ebmeyer E, et al. 2018.** Adaptive selection of founder segments and  
912 epistatic control of plant height in the MAGIC winter wheat population WM-800. *BMC*  
913 *Genomics* **19**(1): 559.
- 914 **Savelli B, Li Q, Webber M, Jemmat AM, Robitaille A, Zamocky M, Mathé C, Dunand C.**  
915 **2019.** RedoxiBase: A database for ROS homeostasis regulated proteins. *Redox*  
916 *Biology* **26**: 101247.
- 917 **Schmidt R, Kunkowska AB, Schippers JHM. 2016.** Role of reactive oxygen species  
918 during cell expansion in leaves. *Plant Physiology* **172**(4): 2098-2106.
- 919 **Schopfer P. 1996.** Hydrogen peroxide-mediated cell-wall stiffening in vitro in maize  
920 coleoptiles. *Planta* **199**(1): 43-49.
- 921 **Scott MF, Fradgley N, Bentley AR, Brabbs T, Corke F, Gardner KA, Horsnell R, Howell**  
922 **P, Ladejobi O, Mackay IJ, et al. 2021.** Limited haplotype diversity underlies  
923 polygenic trait architecture across 70 years of wheat breeding. *Genome Biology*  
924 **22**(137): 1-30.
- 925 **Šimková H, Svensson JT, Condamine P, Hřibová E, Suchánková P, Bhat PR, Bartoš J,**  
926 **Šafář J, Close TJ, Doležel J. 2008.** Coupling amplified DNA from flow-sorted  
927 chromosomes to high-density SNP mapping in barley. *BMC Genomics* **9**(1): 294.
- 928 **Smirnoff N, Arnaud D. 2019.** Hydrogen peroxide metabolism and functions in plants. *New*  
929 *Phytologist* **221**(3): 1197-1214.
- 930 **Srinivasachary, Gosman N, Steed A, Hollins TW, Bayles R, Jennings P, Nicholson P.**  
931 **2009.** Semi-dwarfing *Rht-B1* and *Rht-D1* loci of wheat differ significantly in their  
932 influence on resistance to Fusarium head blight. *Theor Appl Genet* **118**(4): 695-702.
- 933 **Sun L, Yang W, Li Y, Shan Q, Ye X, Wang D, Yu K, Lu W, Xin P, Pei Z, et al. 2019.** A  
934 wheat dominant dwarfing line with *Rht12*, which reduces stem cell length and affects



- 935 gibberellic acid synthesis, is a 5AL terminal deletion line. *The Plant Journal* **97**(5):  
936 887-900.
- 937 **Supek F, Bošnjak M, Škunca N, Šmuc T. 2011.** REVIGO summarizes and visualizes long  
938 lists of gene ontology terms. *PLOS ONE* **6**(7): e21800.
- 939 **Talbot MJ, White RG. 2013.** Cell surface and cell outline imaging in plant tissues using the  
940 backscattered electron detector in a variable pressure scanning electron microscope.  
941 *Plant Methods* **9**(1): 40.
- 942 **Tameling WIL, Vossen JH, Albrecht M, Lengauer T, Berden JA, Haring MA,**  
943 **Cornelissen BJC, Takken FLW. 2006.** Mutations in the NB-ARC domain of I-2 that  
944 impair ATP hydrolysis cause autoactivation. *Plant Physiology* **140**(4): 1233-1245.
- 945 **Tang T. 2016.** *Physiological and genetic studies of an alternative semi-dwarfing gene Rht18*  
946 *in wheat*. University of Tasmania.
- 947 **Thomas SG. 2017.** Novel *Rht-1* dwarfing genes: tools for wheat breeding and dissecting the  
948 function of DELLA proteins. *Journal of Experimental Botany* **68**(3): 354-358.
- 949 **Tian X, Xia X, Xu D, Liu Y, Xie L, Hassan MA, Song J, Li F, Wang D, Zhang Y, et al.**  
950 **2022.** *Rht24b*, an ancient variation of *TaGA2ox-A9*, reduces plant height without yield  
951 penalty in wheat. *New Phytologist* **233**(2): 738-750.
- 952 **Training W. nd.** Wheat DNA extraction in 96-well plates. [http://www.wheat-training.com/wp-](http://www.wheat-training.com/wp-content/uploads/Wheat_growth/pdfs/DNA_extraction_protocol.pdf)  
953 [content/uploads/Wheat\\_growth/pdfs/DNA\\_extraction\\_protocol.pdf](http://www.wheat-training.com/wp-content/uploads/Wheat_growth/pdfs/DNA_extraction_protocol.pdf).
- 954 **Uauy C, Distelfeld A, Fahima T, Blechl A, Dubcovsky J. 2006.** A NAC gene regulating  
955 senescence improves grain protein, zinc, and iron content in wheat. *Science*  
956 **314**(5803): 1298-1301.
- 957 **Vrána J, Kubaláková M, Simková H, Cíhalíková J, Lysák MA, Doležel J. 2000.** Flow  
958 sorting of mitotic chromosomes in common wheat (*Triticum aestivum* L.). *Genetics*  
959 **156**(4): 2033-2041.
- 960 **Walkowiak S, Gao L, Monat C, Haberer G, Kassa MT, Brinton J, Ramirez-Gonzalez RH,**  
961 **Kolodziej MC, Delorean E, Thambugala D, et al. 2020.** Multiple wheat genomes  
962 reveal global variation in modern breeding. *Nature* **588**(7837): 277-283.
- 963 **Wang M, Li Z, Matthews PR, Upadhyaya NM, Waterhouse PM 1998.** Improved vectors for  
964 *Agrobacterium tumefaciens*-mediated transformation of monocot plants: International  
965 Society for Horticultural Science (ISHS), Leuven, Belgium. 401-408.
- 966 **Wang S, Wong D, Forrest K, Allen A, Chao S, Huang BE, Maccaferri M, Salvi S, Milner**  
967 **SG, Cattivelli L, et al. 2014.** Characterization of polyploid wheat genomic diversity  
968 using a high-density 90 000 single nucleotide polymorphism array. *Plant*  
969 *Biotechnology Journal* **12**(6): 787-796.
- 970 **Wang Y, Chen L, Du Y, Yang Z, Condon AG, Hu Y-G. 2014.** Genetic effect of dwarfing  
971 gene *Rht13* compared with *Rht-D1b* on plant height and some agronomic traits in  
972 common wheat (*Triticum aestivum* L.). *Field Crops Research* **162**: 39-47.
- 973 **Wang Y, Du Y, Yang Z, Chen L, Condon AG, Hu Y-G. 2015.** Comparing the effects of GA-  
974 responsive dwarfing genes *Rht13* and *Rht8* on plant height and some agronomic  
975 traits in common wheat. *Field Crops Research* **179**: 35-43.
- 976 **Yan J, Su P, Li W, Xiao G, Zhao Y, Ma X, Wang H, Nevo E, Kong L. 2019.** Genome-wide  
977 and evolutionary analysis of the class III peroxidase gene family in wheat and  
978 *Aegilops tauschii* reveals that some members are involved in stress responses. *BMC*  
979 *Genomics* **20**(1): 666.
- 980 **Yang S, Hua J. 2004.** A haplotype-specific *Resistance* gene regulated by *BONZA1*  
981 mediates temperature-dependent growth control in Arabidopsis. *The Plant cell* **16**(4):  
982 1060-1071.
- 983 **Young MD, Wakefield MJ, Smyth GK, Oshlack A. 2010.** Gene ontology analysis for RNA-  
984 seq: accounting for selection bias. *Genome Biology* **11**(2): R14.
- 985 **Zhang W, Chen S, Abate Z, Nirmala J, Rouse MN, Dubcovsky J. 2017.** Identification and  
986 characterization of *Sr13*, a tetraploid wheat gene that confers resistance to the Ug99  
987 stem rust race group. *Proceedings of the National Academy of Sciences* **114**(45):  
988 E9483-E9492.
